# Supplementary material
Source: PubMed Central journal article supplement (PMC10044381)
Supplement: 40168_2023_1500_MOESM4_ESM.pdf [file 40168_2023_1500_MOESM4_ESM.pdf]

# In-depth study of tomato and weed viromes reveals undiscovered plant virus diversity in an agroecosystem

Rivarez, MPS<sup>1,2,\*</sup>, Pecman, A<sup>1,2</sup>, Bačnik, K<sup>1,2</sup>, Maksimović Carvalho Ferreira, O<sup>1,2</sup>, Vučurović, A<sup>1</sup>, Seljak, G<sup>1</sup>, Mehle, N<sup>1,3</sup>, Gutiérrez-Aguirre, I<sup>1</sup>, Ravnikar, M<sup>1</sup>, and Kutnjak, D<sup>1,\*</sup>

<sup>1</sup>Department of Biotechnology and Systems Biology, National Institute of Biology, Večna pot 111, Ljubljana, 1000 Slovenia. <sup>2</sup>Jožef Stefan International Postgraduate School, Jamova cesta 39, Ljubljana, 1000 Slovenia. <sup>3</sup>School for Viticulture and Enology, University of Nova Gorica, Dvorec Lanthieri Glavni trg 8, Vipava, 5271 Slovenia. \*for correspondence email Denis Kutnjak ([denis.kutnjak@nib.si](mailto:denis.kutnjak@nib.si)) and Mark Paul Selda Rivarez ([mpsrivarez@gmail.com](mailto:mpsrivarez@gmail.com))

## SUPPLEMENTARY INFORMATION

### Additional File 04

**Supplementary Table 7.** RT-PCR primers and PCR conditions used in confirmation of associated plant hosts of selected viruses and putative viroids. **Supplementary Table 8.** RT-PCR thermocycling conditions used in the detection of selected viruses and putative viroids in associated plant hosts. **Supplementary Figure 2.** Orientation and annealing sites of the primers designed for the amplification of the circular genome of *Taraxacum* viroid-like circular RNA 1, and results of RT-PCR confirmation of the circular genome. **Supplementary Table 9.** List of confirmed associated plant hosts of selected viruses and putative viroids.

**Supplementary Table 7.** RT-PCR primers and PCR conditions used in confirmation of associated plant hosts of selected viruses and a putative viroid. Note: GenBank accession numbers of the species indicated above are in Supplementary Table 5.

| No. | Target virus name                    | Primer ID | Strand  | Sequence (5'→3')       | Length (bases) | Target genome region (start, end position / gene(s)) |      |                 | Annealing temperature. (°C) | Amplicon size (bases) |
|-----|--------------------------------------|-----------|---------|------------------------|----------------|------------------------------------------------------|------|-----------------|-----------------------------|-----------------------|
|     |                                      |           |         |                        |                | Start                                                | End  | Gene            |                             |                       |
| 01  | Artemisia fimovirus 1                | NFimo1-F  | forward | ACATGGAAGTGACAGTTCTCC  | 22             | 5889                                                 | 6435 | RdRP            | 57                          | 547                   |
|     |                                      | NFimo1-R  | reverse | ATAGTTGACGCCTACCCATTGC | 22             |                                                      |      |                 |                             |                       |
| 02  | Calystegia geminivirus 1             | NGemi1-F  | forward | CAGAACCTCAACCTTCCATTCC | 22             | 248                                                  | 817  | replicase       | 57                          | 570                   |
|     |                                      | NGemi1-R  | reverse | CCAATCAGCTCTTCCAGTGC   | 21             |                                                      |      |                 |                             |                       |
| 03  | Plantago potyvirus 1                 | NPoty1-F  | forward | AGGCTAGAGATCGAAACTTGG  | 22             | 5687                                                 | 6550 | polyprotein     | 57                          | 864                   |
|     |                                      | NPoty1-R  | reverse | CAACTTTATCCGTGCTCTGTGG | 22             |                                                      |      |                 |                             |                       |
| 04  | Mentha macluravirus 1                | NPoty2-F  | forward | ACATACGGCTCAGCTTCTTCC  | 22             | 2474                                                 | 3306 | polyprotein     | 57                          | 833                   |
|     |                                      | NPoty2-R  | reverse | GGCACAGAGAACTCAACATCG  | 22             |                                                      |      |                 |                             |                       |
| 05  | Rumex potyvirus 1                    | NPoty3-F  | forward | GTTGACCTAACCCCTCACAACC | 22             | 7098                                                 | 7733 | polyprotein     | 57                          | 636                   |
|     |                                      | NPoty3-R  | reverse | CACTACTGGTAGCCCACTGC   | 22             |                                                      |      |                 |                             |                       |
| 06  | broad-leafed dock virus A, isolate 2 | NPoty4-F  | forward | GGATGAGGAATATGGAGCTTGG | 22             | 7502                                                 | 8178 | polyprotein     | 57                          | 677                   |
|     |                                      | NPoty4-R  | reverse | TACTAGGCGGTGGAAGAAACC  | 22             |                                                      |      |                 |                             |                       |
| 07  | Pastinaca umbravirus 1               | NTomb1-F  | forward | GCGAGACTGTCTGTACCACTGC | 22             | 2504                                                 | 3354 | RdRP-MP         | 57                          | 851                   |
|     |                                      | NTomb1-R  | reverse | CAGTCGTACCCCTCTAACTGG  | 22             |                                                      |      |                 |                             |                       |
| 08  | Picris umbravirus 1                  | NTomb2-F  | forward | TCGTGCTGTATAGGGTTCATGG | 22             | 1846                                                 | 2839 | RdRP            | 57                          | 994                   |
|     |                                      | NTomb2-R  | reverse | CAAAC TCCCAAATGGACTACC | 22             |                                                      |      |                 |                             |                       |
| 09  | Convolvulus aureusvirus 1            | NTomb3-F  | forward | GAAAGTCAGCCGAATTGTAGGG | 22             | 1088                                                 | 1814 | RdRP            | 57                          | 727                   |
|     |                                      | NTomb3-R  | reverse | CAATCCAAGTTGGTCCTTCTCC | 22             |                                                      |      |                 |                             |                       |
| 10  | Calystegia pelarspovirus 1           | NTomb4-F  | forward | GCCGAATGAGGGTATGTTTAGG | 22             | 1019                                                 | 1594 | RdRP            | 57                          | 576                   |
|     |                                      | NTomb4-R  | reverse | GTTCCGCTGTTCTTCAACTGG  | 21             |                                                      |      |                 |                             |                       |
| 11  | Cichorium alphacarmovirus 1          | NTomb6-F  | forward | GGAGAAACATGAGGAACGAACC | 22             | 322                                                  | 989  | RdRP            | 57                          | 668                   |
|     |                                      | NTomb6-R  | reverse | AGAAAACCCTTTCCAGGAGACC | 22             |                                                      |      |                 |                             |                       |
| 12  | Pastinaca potexvirus 1               | NAflex1-F | forward | CACAGTGGATGAGGATGTAGCC | 22             | 3565                                                 | 4542 | polyprotein-TGB | 57                          | 978                   |
|     |                                      | NAflex1-R | reverse | TTCGTAAGCTGAGCTGAGTTGG | 22             |                                                      |      |                 |                             |                       |
| 13  | plant associated tobamo-like virus 1 | NVirga1-F | forward | CTTCACCTGTCTCAGTGAGGAC | 22             | 115                                                  | 522  | replicase       | 55                          | 408                   |
|     |                                      | NVirga1-R | reverse | TATGAGTTGCGATGGGTAGACG | 22             |                                                      |      |                 |                             |                       |
| 14  | Plantago tobamovirus 1               | NVirga2-F | forward | AACGCACTATCCGAGCTATCTG | 22             | 1720                                                 | 2421 | replicase       | 55                          | 702                   |
|     |                                      | NVirga2-R | reverse | TACAGCCACCCTAAACCATGTC | 22             |                                                      |      |                 |                             |                       |

|    |                                                   |                          |                    |                                                       |          |       |       |                     |    |      |
|----|---------------------------------------------------|--------------------------|--------------------|-------------------------------------------------------|----------|-------|-------|---------------------|----|------|
| 15 | Mercurialis orthospovirus 1                       | NTospo1-F<br>NTospo1-R   | forward<br>reverse | TAGAGCCGAAGATGTTGTGGAC<br>GTCAGCGACCATTAAGCCTTTG      | 22<br>22 | 1661  | 2291  | L gene<br>(RdRP)    | 55 | 631  |
| 16 | tomato associated bunya-like virus 1              | NTospo2-F<br>NTospo2-R   | forward<br>reverse | CGAAAGGAGGCGATAGTGATGC<br>CTGCGTCATCCCTACCTGATAC      | 22<br>22 | 7109  | 7615  | L gene<br>(RdRP)    | 56 | 507  |
| 17 | tomato vitivirus 1                                | NBflexi1-F<br>NBflexi1-R | forward<br>reverse | TCTTTCCCTCTTGATCTGTGC<br>GTGAACCCCTGAATTGGTTGAGC      | 22<br>22 | 1057  | 1540  | movement<br>protein | 55 | 484  |
| 18 | Prunus virus I                                    | NBromo1-F<br>NBromo1-R   | forward<br>reverse | AAGTTTCGAGACCTTTGCGTTG<br>CTCAAACACACTTCCGCTTCAG      | 22<br>22 | 826   | 1699  | movement<br>protein | 55 | 874  |
| 19 | tomato ilarvirus 1                                | NBromo2-F<br>NBromo2-R   | forward<br>reverse | ACATGGCGTTAGATGGTAGGTC<br>AAATTGCGAGACAAGGTTCTGTG     | 22<br>22 | 945   | 1824  | movement<br>protein | 55 | 880  |
| 20 | Ranunculus white mottle ophiovirus                | RWMV-F<br>RWMV-R         | forward<br>reverse | TGTGTGTTTCATCTCTTCTGTC<br>ACAGGGAAGTGAATCACACCTA      | 22<br>22 | 804   | 1296  | coat<br>protein     | 54 | 493  |
| 21 | tomato betanucleorhabdovirus 1                    | NRhabdo1-F<br>NRhabdo1-R | forward<br>reverse | GACGGTAGGTTACAATCTCC<br>TGATAGGGCTAGGATATGGG          | 20<br>20 | 12078 | 12589 | L gene<br>(RdRP)    | 55 | 512  |
| 22 | Pastinaca cytorhabdovirus 1                       | NRhab3-F<br>NRhab3-R     | forward<br>reverse | GAGGAAAAAGTCTGTCATGGAC<br>GCAAGGTAATAATAGCACTCGG      | 22<br>22 | 1395  | 1925  | L gene<br>(RdRP)    | 52 | 531  |
| 23 | tomato betanucleorhabdovirus 2                    | NRhab4-F<br>NRhab4-R     | forward<br>reverse | TTCCTGTTTCATTATCACAATGC<br>GTTAGTTGACCAAGAGTACCAG     | 22<br>22 | 4279  | 4874  | L gene<br>(RdRP)    | 51 | 596  |
| 24 | Picris betanucleorhabdovirus 1                    | NRhab5-F<br>NRhab5-R     | forward<br>reverse | ATTGTTACACGATATTGCTGGG<br>TTCCTCATATCTCCACCTCAAC      | 22<br>22 | 3300  | 3816  | L gene<br>(RdRP)    | 52 | 517  |
| 25 | Cirsium cytorhabdovirus 1                         | NRhab6-F<br>NRhab6-R     | forward<br>reverse | TTTAGTTAGATCATTACGGCG<br>TGAGGTCCCTTGATAATCGATC       | 22<br>22 | 2204  | 2742  | L gene<br>(RdRP)    | 52 | 539  |
| 26 | Taraxacum betanucleorhabdovirus 1                 | NRhab7-F<br>NRhab7-R     | forward<br>reverse | ATAGTTCGGACAGATCAAGGAG<br>ATCTCAAATGTTGCCACTCTC       | 22<br>22 | 5196  | 5757  | L gene<br>(RdRP)    | 52 | 562  |
| 27 | Picris cytorhabdovirus 1                          | NRhab8-F<br>NRhab8-R     | forward<br>reverse | TCGACCAAAAGATAACAACGAC<br>CTTTGAAAATCACTAGTCCGGG      | 22<br>22 | 5798  | 6389  | L gene<br>(RdRP)    | 52 | 592  |
| 28 | Taraxacum cytorhabdovirus 1                       | NRhab9-F<br>NRhab9-R     | forward<br>reverse | CTGTATGTGGTGAAGTCAATGG<br>TCTCATTCTTTTCGCTTCTTCG      | 22<br>22 | 2799  | 3347  | L gene<br>(RdRP)    | 52 | 549  |
| 29 | tomato alphanucleorhabdovirus 1                   | NRhab10-F<br>NRhab10-R   | forward<br>reverse | GATTGTATTTCCCACTACGGACAAC<br>CATACCATCATCACATAGTGTGGC | 25<br>25 | 3182  | 4230  | L gene<br>(RdRP)    | 55 | 1049 |
| 30 | Leveillula taurica associated rhabdo-like virus 1 | NRhab2-F<br>NRhab2-R     | forward<br>reverse | CCACATTATGACACAAGACCAG<br>TAAGCTTTGTACCTAACGCAC       | 22<br>22 | 330   | 844   | L gene<br>(RdRP)    | 52 | 515  |
| 31 | eggplant mottled dwarf alphanucleorhabdovirus     | EMDV-F<br>EMDV-R         | forward<br>reverse | TACTCATTACACAAAGAGAAGC<br>CGGTATAGTTATACTAGCAGCA      | 22<br>22 | 143   | 699   | L gene<br>(RdRP)    | 51 | 557  |

|    |                                                                                                       |            |          |                          |    |            |            |                |    |     |
|----|-------------------------------------------------------------------------------------------------------|------------|----------|--------------------------|----|------------|------------|----------------|----|-----|
| 32 | Physostegia chlorotic mottle alphanucleorhabdovirus                                                   | PhCMoV-F   | forward  | ATAGTGACATTCTGTTTGACCG   | 22 | 2810       | 3463       | L gene (RdRP)  | 52 | 654 |
|    |                                                                                                       | PhCMoV-R   | reverse  | CCCATACTACCCATTATTCTGC   | 22 |            |            |                |    |     |
| 33 | tomato fruit blotch virus                                                                             | ToFBV-R3-F | forward  | GTGGTTATTATGGATATACCTGCG | 24 | 654        | 1371       | coat protein   | 52 | 718 |
|    |                                                                                                       | ToFBV-R3-R | reverse  | GAGAGAACACAAAACAAGAAGC   | 22 |            |            |                |    |     |
| 34 | Solanum nigrum ilarvirus 1                                                                            | SnIV-R3-F  | forward  | GTATGAAAACCTTCAACCTCTCC  | 22 | 1248       | 1916       | coat protein   | 52 | 669 |
|    |                                                                                                       | SnIV-R3-R  | reverse  | ATATAGCTACCCAGAAATCAGC   | 22 |            |            |                |    |     |
| 35 | tomato matilda virus                                                                                  | TMaV-F     | forward  | ACTAGCCGTTATATTTAGTGGG   | 22 | 5293       | 5900       | polyprotein    | 52 | 608 |
|    |                                                                                                       | TMaV-R     | reverse  | CTACTATACTGAGAACTCCTTTCC | 24 |            |            |                |    |     |
| 36 | Taraxacum viroid-like circular RNA 1<br>(Note: LP - linear amplification, C - circular amplification) | NVrd1-F-LP | forward  | TCGGCTAGTCTTTTTCCGGTAAC  | 22 | 138        | 392        | not applicable | 55 | 255 |
|    |                                                                                                       | NVrd1-R-LP | reverse  | AGGTGAAAGCCTTTCCTATCC    | 22 |            |            |                |    |     |
|    |                                                                                                       | NVrd1-F-C  | primer 1 | GGCTCGCTTAGACTCTACAAATTG | 24 | 277        | 291        | not applicable | 55 | 433 |
|    |                                                                                                       | NVrd1-R-C  | primer 2 | CTGGTTTGAGTCTTAGAACTGACC | 24 | (+) strand | (-) strand |                |    |     |

**Supplementary Table 8.** RT-PCR thermocycling conditions used in the detection of selected viruses and putative viroids in associated plant hosts.

|                                           |                                                                                                             |             |
|-------------------------------------------|-------------------------------------------------------------------------------------------------------------|-------------|
| Reverse transcription step (2 sub-steps): | 30 min at 50°C<br>15 min at 95°C                                                                            | } 35 cycles |
| PCR step (3 sub-steps):                   | 0.5 min at 94°C<br>0.5 min at annealing temperature (°C) in <b>Supplementary Table 7</b><br>1.0 min at 72°C |             |
| Extension step:                           | 10 min at 72°C                                                                                              |             |

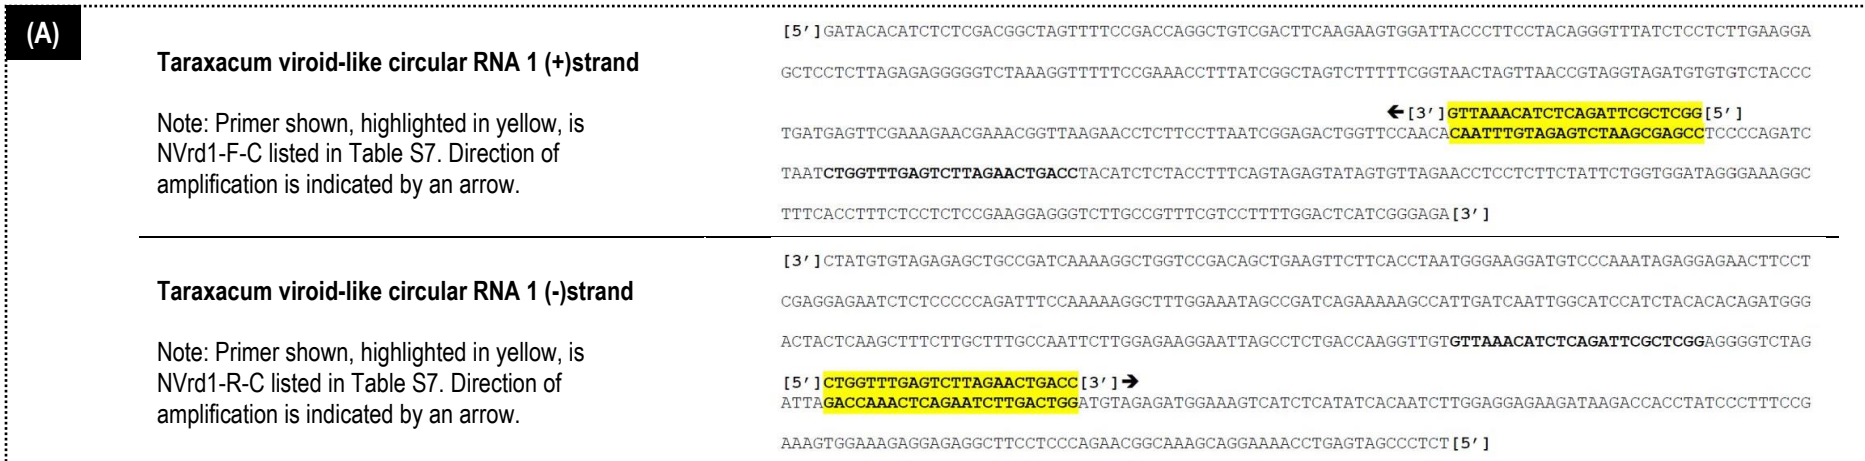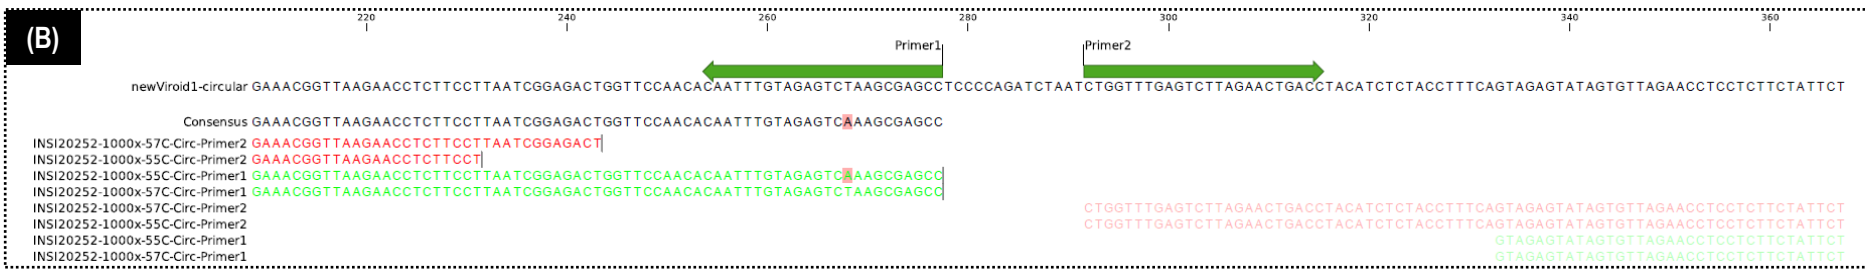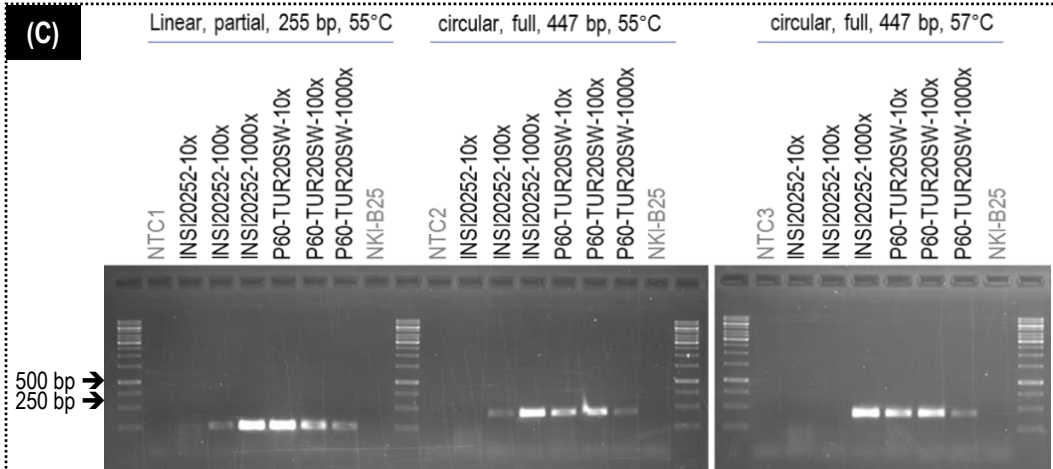

**Supplementary Figure 2.** Primer design and RT-PCR tests for *Taraxacum viroid-like circular RNA 1*. (A) Orientation and annealing sites of the primers designed to amplify the circular genome of *Taraxacum viroid-like circular RNA 1*. (B-C) Reassembly of selected sequenced amplicons from the RT-PCR tests (B) in samples with increasing dilution factors shown in (C). Abutting primers are shown in green arrows, demarcating the 14 nucleotide gap between them (B). Note: In (C): NTC1, NTC2 – non-template controls; NKI-B25 - negative control of isolation in the RNA extraction, INSI20252 - *Taraxacum officinale* sample, P60-TUR20SW - sequenced composite sample where INSI20252 belong.

**Supplementary Table 9.** List of confirmed associated plant hosts of selected viruses. For information related to the individual plant samples and the composite samples, please refer to Supplementary Table 1 and 2. Note: In most of the cases infection of multiple viruses in individual plants with cannot be excluded, except if stated otherwise.

| No. | Virus name                           | Sample ID | Tissue | Plant species name           | Plant family   | Symptoms (if any)                                   |
|-----|--------------------------------------|-----------|--------|------------------------------|----------------|-----------------------------------------------------|
| 01  | Artemisia fimovirus 1                | INSI20094 | leaf   | <i>Artemisia verlotiorum</i> | Asteraceae     | mild leaf yellowing                                 |
| 02  | Calystegia geminivirus 1             | INSI20122 | leaf   | <i>Calystegia</i> sp.        | Convolvulaceae | leaf yellowing with crumpling deformation           |
| 03  | Plantago potyvirus 1                 | INSI19064 | leaf   | <i>Plantago lanceolata</i>   | Plantaginaceae | interveinal leaf yellowing with deformation         |
| 04  | Mentha macluravirus 1                | INSI20169 | leaf   | <i>Mentha spicata</i>        | Lamiaceae      | mild leaf yellowing with a few necrotic spots       |
| 05  | Rumex potyvirus 1                    | INSI20188 | leaf   | <i>Rumex</i> sp.             | Polygonaceae   | ring-like chlorotic lesions and red spots on leaves |
|     |                                      | INSI20199 | leaf   | <i>Convolvulus</i> sp.       | Convolvulaceae | leaf chlorosis                                      |
| 06  | Broad-leafed dock virus A, isolate 2 | INSI20253 | leaf   | <i>Rumex crispus</i>         | Polygonaceae   | leaf chlorosis with mottling                        |
| 07  | Pastinaca umbravirus 1               | INSI19137 | leaf   | <i>Pastinaca sativa</i>      | Apiaceae       | necrotic spots, mosaic on leaves                    |
|     |                                      | INSI19156 | leaf   | <i>Pastinaca sativa</i>      | Apiaceae       | irregular leaf chlorosis                            |
|     |                                      | INSI20168 | leaf   | <i>Pastinaca sativa</i>      | Apiaceae       | irregular leaf chlorosis                            |
| 08  | Picris umbravirus 1                  | INSI19136 | leaf   | <i>Picris echoides</i>       | Asteraceae     | necrotic leaf lesions                               |
|     |                                      | INSI20082 | leaf   | <i>Picris echoides</i>       | Asteraceae     | chlorotic leaf spots                                |
| 09  | Convolvulus aureusvirus 1            | INSI20072 | leaf   | <i>Convolvulus arvensis</i>  | Convolvulaceae | necrotic leaf lesions                               |
|     |                                      | INSI20073 | leaf   | <i>Convolvulus arvensis</i>  | Convolvulaceae | leaf curling with mild yellowing                    |
| 10  | Calystegia pelarspovirus 1           | INSI20122 | leaf   | <i>Calystegia</i> sp.        | Convolvulaceae | leaf yellowing with crumpling deformation           |
|     |                                      | INSI20163 | leaf   | <i>Calystegia</i> sp.        | Convolvulaceae | necrotic leaf lesions with yellow halo              |
| 11  | Cichorium alphacarmovirus 1          | INSI19123 | leaf   | <i>Cichorium intybus</i>     | Asteraceae     | leaf mosaic, leaf dwarfing and deformation          |
|     |                                      | INSI20074 | leaf   | <i>Cichorium intybus</i>     | Asteraceae     | necrotic leaf lesions                               |
|     |                                      | INSI20075 | leaf   | <i>Picris echoides</i>       | Asteraceae     | leaf mosaic                                         |
|     |                                      | INSI20078 | leaf   | <i>Picris echoides</i>       | Asteraceae     | redness of leaves, necrosis on flowers              |
|     |                                      | INSI20082 | leaf   | <i>Picris echoides</i>       | Asteraceae     | chlorotic leaf spots                                |
| 12  | Pastinaca potexvirus 1               | INSI19137 | leaf   | <i>Pastinaca sativa</i>      | Apiaceae       | necrotic spots, mosaic on leaves                    |
| 13  | Plant associated tobamo-like virus 1 | INSI19082 | leaf   | <i>Convolvulus arvensis</i>  | Convolvulaceae | with powdery mildew colonization / infection        |
|     |                                      | INSI20147 | leaf   | <i>Solanum lycopersicum</i>  | Solanaceae     | none (asymptomatic)                                 |
|     |                                      | INSI20152 | leaf   | <i>Solanum lycopersicum</i>  | Solanaceae     | none (asymptomatic)                                 |
|     |                                      | INSI20157 | leaf   | <i>Solanum lycopersicum</i>  | Solanaceae     | none (asymptomatic)                                 |
|     |                                      | INSI20158 | leaf   | <i>Solanum lycopersicum</i>  | Solanaceae     | none (asymptomatic)                                 |

|    |                                      |            |       |                             |                |                                                      |
|----|--------------------------------------|------------|-------|-----------------------------|----------------|------------------------------------------------------|
|    |                                      | INSI20159  | leaf  | <i>Solanum lycopersicum</i> | Solanaceae     | none (asymptomatic)                                  |
|    |                                      | INSI20146  | leaf  | <i>Solanum lycopersicum</i> | Solanaceae     | interveinal leaf yellowing                           |
|    |                                      | INSI20148  | leaf  | <i>Solanum lycopersicum</i> | Solanaceae     | interveinal leaf yellowing                           |
|    |                                      | INSI20149  | leaf  | <i>Solanum lycopersicum</i> | Solanaceae     | interveinal leaf yellowing                           |
|    |                                      | INSI20150  | leaf  | <i>Solanum lycopersicum</i> | Solanaceae     | interveinal leaf yellowing                           |
|    |                                      | INSI20151  | leaf  | <i>Solanum lycopersicum</i> | Solanaceae     | interveinal leaf yellowing                           |
|    |                                      | INSI20154  | fruit | <i>Solanum lycopersicum</i> | Solanaceae     | irregular yellow discolorations on fruits            |
|    |                                      | INSI20155  | fruit | <i>Solanum lycopersicum</i> | Solanaceae     | irregular yellow discolorations on fruits            |
|    |                                      | INSI20156  | fruit | <i>Solanum lycopersicum</i> | Solanaceae     | irregular yellow discolorations on fruits            |
|    |                                      | INSI20156F | fruit | <i>Solanum lycopersicum</i> | Solanaceae     | irregular yellow discolorations on fruits            |
| 14 | Plantago tobamovirus 1               | INSI19124  | leaf  | <i>Plantago major</i>       | Plantaginaceae | leaf mosaic                                          |
| 15 | Mercurialis orthotospovirus 1        | INSI19080  | leaf  | <i>Mercurialis annua</i>    | Euphorbiaceae  | leaf chlorosis with slight deformation               |
|    |                                      | INSI19098  | leaf  | <i>Mercurialis annua</i>    | Euphorbiaceae  | leaf chlorosis with deformation and necrotic lesions |
|    |                                      | INSI19121  | leaf  | <i>Mercurialis annua</i>    | Euphorbiaceae  | none (asymptomatic)                                  |
|    |                                      | INSI20111  | leaf  | <i>Mercurialis annua</i>    | Euphorbiaceae  | leaf deformation                                     |
|    |                                      | INSI20112  | leaf  | <i>Mercurialis annua</i>    | Euphorbiaceae  | necrotic leaf spots, shot-hole symptoms              |
| 16 | Tomato associated bunya-like virus 1 | INSI20083  | leaf  | <i>Solanum lycopersicum</i> | Solanaceae     | leaf yellowing with necrotic lesions                 |
|    |                                      | INSI20084  | leaf  | <i>Solanum lycopersicum</i> | Solanaceae     | leaf yellowing                                       |
|    |                                      | INSI20085  | leaf  | <i>Solanum lycopersicum</i> | Solanaceae     | leaf yellowing with necrotic lesions                 |
|    |                                      | INSI20088  | leaf  | <i>Solanum lycopersicum</i> | Solanaceae     | leaf deformation                                     |
|    |                                      | INSI20088F | fruit | <i>Solanum lycopersicum</i> | Solanaceae     | yellow discoloration                                 |
|    |                                      | INSI20089  | leaf  | <i>Solanum lycopersicum</i> | Solanaceae     | leaf yellowing with necrotic lesions                 |
|    |                                      | INSI20090  | leaf  | <i>Solanum lycopersicum</i> | Solanaceae     | leaf yellowing with necrotic lesions                 |
| 17 | Tomato vitivirus 1                   | INSI20124  | leaf  | <i>Solanum lycopersicum</i> | Solanaceae     | necrotic leaf lesions                                |
|    |                                      | INSI20124F | fruit | <i>Solanum lycopersicum</i> | Solanaceae     | yellow discoloration on fruits, necrosis on sepals   |
| 18 | Prunus virus I                       | INSI20078  | leaf  | <i>Picris echoides</i>      | Asteraceae     | red discolorations on leaf and sepal tips            |
| 19 | Tomato ilarvirus 1                   | INSI20087  | leaf  | <i>Solanum lycopersicum</i> | Solanaceae     | none (asymptomatic)                                  |
| 20 | Ranunculus white mottle ophiovirus   | INSI19037  | leaf  | <i>Solanum lycopersicum</i> | Solanaceae     | necrotic leaf spots                                  |
|    |                                      | INSI19040  | leaf  | <i>Solanum lycopersicum</i> | Solanaceae     | necrotic leaf spots, discoloration on fruits         |
|    |                                      | INSI19042  | leaf  | <i>Solanum lycopersicum</i> | Solanaceae     | necrotic leaf spots                                  |
|    |                                      | INSI19043  | leaf  | <i>Solanum lycopersicum</i> | Solanaceae     | mild leaf chlorosis                                  |
|    |                                      | INSI19073  | leaf  | <i>Solanum lycopersicum</i> | Solanaceae     | none (asymptomatic)                                  |
|    |                                      | INSI19074  | leaf  | <i>Solanum lycopersicum</i> | Solanaceae     | leaf yellowing with necrotic lesions                 |

|    |                                                   |            |       |                             |            |                                                            |
|----|---------------------------------------------------|------------|-------|-----------------------------|------------|------------------------------------------------------------|
|    |                                                   | INSI19102  | leaf  | <i>Solanum nigrum</i>       | Solanaceae | none (asymptomatic)                                        |
|    |                                                   | INSI20177  | leaf  | <i>Solanum lycopersicum</i> | Solanaceae | leaf folding                                               |
|    |                                                   | INSI20177F | fruit | <i>Solanum lycopersicum</i> | Solanaceae | fruit deformation, cracking                                |
| 21 | Tomato betanucleorhabdovirus 1                    | INSI19008  | leaf  | <i>Solanum lycopersicum</i> | Solanaceae | leaf folding                                               |
| 22 | Pastinaca cytorhabdovirus 1                       | INSI19137  | leaf  | <i>Pastinaca sativa</i>     | Apiaceae   | necrotic spots, mosaic on leaves                           |
| 23 | Tomato betanucleorhabdovirus 2                    | INSI20041  | leaf  | <i>Solanum lycopersicum</i> | Solanaceae | none (asymptomatic)                                        |
|    |                                                   | INSI20068  | leaf  | <i>Solanum lycopersicum</i> | Solanaceae | none (asymptomatic)                                        |
|    |                                                   | INSI20123  | leaf  | <i>Solanum lycopersicum</i> | Solanaceae | leaf yellowing and deformation, uneven fruit ripening      |
|    |                                                   | INSI20132  | leaf  | <i>Solanum lycopersicum</i> | Solanaceae | leaf yellowing and deformation                             |
|    |                                                   | INSI20133  | leaf  | <i>Solanum lycopersicum</i> | Solanaceae | none (asymptomatic)                                        |
| 24 | Picris betanucleorhabdovirus 1                    | INSI20078  | leaf  | <i>Picris echioides</i>     | Asteraceae | red discolorations on leaf and sepal tips                  |
|    |                                                   | INSI20080  | leaf  | <i>Picris echioides</i>     | Asteraceae | red discolorations on leaf and sepal tips                  |
|    |                                                   | INSI20138  | leaf  | <i>Picris echioides</i>     | Asteraceae | chlorotic and necrotic spots                               |
| 25 | Cirsium cytorhabdovirus 1                         | INSI20161  | leaf  | <i>Cirsium arvense</i>      | Asteraceae | leaf yellowing (near leaf lamina)                          |
| 26 | Taraxacum betanucleorhabdovirus 1                 | INSI20194  | leaf  | <i>Taraxacum officinale</i> | Asteraceae | systemic leaf chlorosis                                    |
|    |                                                   | INSI20252  | leaf  | <i>Taraxacum officinale</i> | Asteraceae | interveinal leaf chlorosis                                 |
| 27 | Picris cytorhabdovirus 1                          | INSI20080  | leaf  | <i>Picris echioides</i>     | Asteraceae | red discolorations on leaf and sepal tips                  |
|    |                                                   | INSI20081  | leaf  | <i>Picris echioides</i>     | Asteraceae | leaf mosaic                                                |
|    |                                                   | INSI20082  | leaf  | <i>Picris echioides</i>     | Asteraceae | red lesions on leaves and midribs                          |
| 28 | Taraxacum cytorhabdovirus 1                       | INSI20194  | leaf  | <i>Taraxacum officinale</i> | Asteraceae | systemic leaf chlorosis                                    |
| 29 | Tomato alphanucleorhabdovirus 1                   | INSI20029  | leaf  | <i>Solanum lycopersicum</i> | Solanaceae | fruit mottling, showing large irregular shape yellow dents |
|    |                                                   | INSI20030  | leaf  | <i>Solanum lycopersicum</i> | Solanaceae | fruit mottling, showing large irregular shape yellow dents |
|    |                                                   | INSI20030F | fruit | <i>Solanum lycopersicum</i> | Solanaceae | fruit mottling, showing large irregular shape yellow dents |
| 30 | Leveillula taurica associated rhabdo-like virus 1 | INSI19051  | leaf  | <i>Solanum lycopersicum</i> | Solanaceae | leaves with powdery mildew colonization, necrotic spots    |
|    |                                                   | INSI19053  | leaf  | <i>Solanum lycopersicum</i> | Solanaceae | leaves with powdery mildew colonization, necrotic spots    |
|    |                                                   | INSI19054  | leaf  | <i>Solanum lycopersicum</i> | Solanaceae | leaves with powdery mildew colonization, necrotic spots    |
|    |                                                   | INSI19055  | leaf  | <i>Solanum lycopersicum</i> | Solanaceae | leaves with powdery mildew colonization, necrotic spots    |
|    |                                                   | INSI19056  | leaf  | <i>Solanum lycopersicum</i> | Solanaceae | leaves with powdery mildew colonization, necrotic spots    |
|    |                                                   | INSI19058  | leaf  | <i>Solanum lycopersicum</i> | Solanaceae | leaves with powdery mildew colonization, necrotic spots    |
| 31 | Eggplant mottled dwarf alphanucleorhabdovirus     | INSI20038  | leaf  | <i>Solanum lycopersicum</i> | Solanaceae | necrotic spots on leaves                                   |
|    |                                                   | INSI20038F | fruit | <i>Solanum lycopersicum</i> | Solanaceae | fruit mottling, showing circular yellow dents              |
|    |                                                   | INSI20039  | leaf  | <i>Solanum lycopersicum</i> | Solanaceae | necrotic spots on leaves                                   |
|    |                                                   | INSI20039F | fruit | <i>Solanum lycopersicum</i> | Solanaceae | fruit mottling, showing circular yellow dents              |



|           |                                                        |                             |            |                                      |            |                                                     |
|-----------|--------------------------------------------------------|-----------------------------|------------|--------------------------------------|------------|-----------------------------------------------------|
| 32        | Physostegia chlorotic mottle<br>alphanucleorhabdovirus | INSI19009                   | leaf       | <i>Solanum lycopersicum</i>          | Solanaceae | fruit and leaf mottling and yellowing, leaf folding |
|           |                                                        | INSI20177                   | leaf       | <i>Solanum lycopersicum</i>          | Solanaceae | leaf folding                                        |
|           |                                                        | INSI20177F                  | fruit      | <i>Solanum lycopersicum</i>          | Solanaceae | fruit deformation, cracking                         |
|           |                                                        | INSI20239F                  | fruit      | <i>Solanum lycopersicum</i>          | Solanaceae | fruit and leaf mottling and yellowing               |
|           |                                                        | INSI20242F                  | fruit      | <i>Solanum lycopersicum</i>          | Solanaceae | fruit and leaf mottling and yellowing               |
| 33        | Tomato fruit blotch virus                              | INSI19101                   | leaf       | <i>Solanum lycopersicum</i>          | Solanaceae | leaf yellowing with necrotic lesions                |
|           |                                                        | INSI19122                   | leaf       | <i>Solanum lycopersicum</i>          | Solanaceae | leaf yellowing with necrotic lesions                |
| 34        | <i>Solanum nigrum</i> ilarvirus 1                      | INSI19127                   | leaf       | <i>Solanum lycopersicum</i>          | Solanaceae | none (asymptomatic)                                 |
|           |                                                        | INSI19133                   | leaf       | <i>Solanum lycopersicum</i>          | Solanaceae | none (asymptomatic)                                 |
|           |                                                        | INSI19134                   | leaf       | <i>Solanum lycopersicum</i>          | Solanaceae | mild yellowing and leaf twisting and deformations   |
|           |                                                        | INSI20216                   | leaf       | <i>Physalis</i> sp.                  | Solanaceae | uneven leaf yellowing                               |
| 35        | Tomato matilda virus                                   | INSI19073                   | leaf       | <i>Solanum lycopersicum</i>          | Solanaceae | none (asymptomatic)                                 |
|           |                                                        | INSI19085                   | leaf       | <i>Solanum lycopersicum</i>          | Solanaceae | none (asymptomatic)                                 |
|           |                                                        | INSI19086                   | leaf       | <i>Solanum lycopersicum</i>          | Solanaceae | none (asymptomatic)                                 |
|           |                                                        | INSI19087                   | leaf       | <i>Solanum lycopersicum</i>          | Solanaceae | none (asymptomatic)                                 |
|           |                                                        | INSI19088                   | leaf       | <i>Solanum lycopersicum</i>          | Solanaceae | none (asymptomatic)                                 |
|           |                                                        | INSI19089                   | leaf       | <i>Solanum lycopersicum</i>          | Solanaceae | none (asymptomatic)                                 |
|           |                                                        | INSI19091                   | leaf       | <i>Solanum lycopersicum</i>          | Solanaceae | none (asymptomatic)                                 |
|           |                                                        | INSI19092                   | leaf       | <i>Solanum lycopersicum</i>          | Solanaceae | none (asymptomatic)                                 |
|           |                                                        | INSI19093                   | leaf       | <i>Solanum lycopersicum</i>          | Solanaceae | none (asymptomatic)                                 |
|           |                                                        | INSI19081                   | leaf       | <i>Solanum lycopersicum</i>          | Solanaceae | corky symptoms on fruits, leaf yellowing            |
|           |                                                        | INSI19094                   | leaf       | <i>Solanum lycopersicum</i>          | Solanaceae | yellow spots on leaves                              |
|           |                                                        | INSI19103                   | leaf       | <i>Solanum lycopersicum</i>          | Solanaceae | none (asymptomatic)                                 |
|           |                                                        | INSI19104                   | leaf       | <i>Solanum lycopersicum</i>          | Solanaceae | none (asymptomatic)                                 |
|           |                                                        | INSI19106                   | leaf       | <i>Solanum lycopersicum</i>          | Solanaceae | none (asymptomatic)                                 |
|           |                                                        | INSI19108                   | leaf       | <i>Solanum lycopersicum</i>          | Solanaceae | none (asymptomatic)                                 |
|           |                                                        | INSI19110                   | leaf       | <i>Solanum lycopersicum</i>          | Solanaceae | none (asymptomatic)                                 |
|           |                                                        | INSI19111                   | leaf       | <i>Solanum lycopersicum</i>          | Solanaceae | none (asymptomatic)                                 |
|           |                                                        | INSI19112                   | leaf       | <i>Solanum lycopersicum</i>          | Solanaceae | none (asymptomatic)                                 |
|           |                                                        | INSI19113                   | leaf       | <i>Solanum lycopersicum</i>          | Solanaceae | none (asymptomatic)                                 |
|           |                                                        | INSI19100                   | leaf       | <i>Solanum lycopersicum</i>          | Solanaceae | leaf yellowing with necrotic lesions                |
| INSI19101 | leaf                                                   | <i>Solanum lycopersicum</i> | Solanaceae | leaf yellowing with necrotic lesions |            |                                                     |
| INSI19114 | leaf                                                   | <i>Solanum lycopersicum</i> | Solanaceae | necrotic leaf lesions                |            |                                                     |
| INSI19115 | leaf                                                   | <i>Solanum lycopersicum</i> | Solanaceae | leaf chlorosis with necrotic lesions |            |                                                     |

---

|           |      |                             |                |                                                   |
|-----------|------|-----------------------------|----------------|---------------------------------------------------|
| INSI19116 | leaf | <i>Solanum lycopersicum</i> | Solanaceae     | leaf yellowing with necrotic lesions              |
| INSI19117 | leaf | <i>Solanum lycopersicum</i> | Solanaceae     | leaf yellowing with necrotic lesions              |
| INSI19122 | leaf | <i>Solanum lycopersicum</i> | Solanaceae     | leaf yellowing with necrotic lesions              |
| INSI19126 | leaf | <i>Solanum lycopersicum</i> | Solanaceae     | leaf yellowing with necrotic lesions              |
| INSI19128 | leaf | <i>Solanum lycopersicum</i> | Solanaceae     | leaf yellowing with necrotic lesions              |
| INSI19129 | leaf | <i>Solanum lycopersicum</i> | Solanaceae     | yellow spots on leaves                            |
| INSI19134 | leaf | <i>Solanum lycopersicum</i> | Solanaceae     | mild yellowing and leaf twisting and deformations |
| INSI19135 | leaf | <i>Solanum lycopersicum</i> | Solanaceae     | leaf yellowing with necrotic lesions              |
| INSI19127 | leaf | <i>Solanum lycopersicum</i> | Solanaceae     | none (asymptomatic)                               |
| INSI19130 | leaf | <i>Solanum lycopersicum</i> | Solanaceae     | none (asymptomatic)                               |
| INSI19131 | leaf | <i>Solanum lycopersicum</i> | Solanaceae     | none (asymptomatic)                               |
| INSI19132 | leaf | <i>Solanum lycopersicum</i> | Solanaceae     | none (asymptomatic)                               |
| INSI19133 | leaf | <i>Solanum lycopersicum</i> | Solanaceae     | none (asymptomatic)                               |
| INSI19141 | leaf | <i>Solanum lycopersicum</i> | Solanaceae     | none (asymptomatic)                               |
| INSI19142 | leaf | <i>Solanum lycopersicum</i> | Solanaceae     | none (asymptomatic)                               |
| INSI19143 | leaf | <i>Solanum lycopersicum</i> | Solanaceae     | none (asymptomatic)                               |
| INSI19144 | leaf | <i>Solanum lycopersicum</i> | Solanaceae     | none (asymptomatic)                               |
| INSI19147 | leaf | <i>Solanum lycopersicum</i> | Solanaceae     | none (asymptomatic)                               |
| INSI19148 | leaf | <i>Solanum lycopersicum</i> | Solanaceae     | none (asymptomatic)                               |
| INSI19139 | leaf | <i>Solanum lycopersicum</i> | Solanaceae     | leaf yellowing with necrotic lesions              |
| INSI19149 | leaf | <i>Solanum lycopersicum</i> | Solanaceae     | leaf yellowing                                    |
| INSI19151 | leaf | <i>Solanum lycopersicum</i> | Solanaceae     | none (asymptomatic)                               |
| INSI19154 | leaf | <i>Solanum lycopersicum</i> | Solanaceae     | leaf mottling, dwarfing and twisting              |
| INSI19155 | leaf | <i>Solanum lycopersicum</i> | Solanaceae     | leaf mottling, dwarfing and twisting              |
| INSI19140 | leaf | <i>Chenopodium</i> sp.      | Chenopodiaceae | yellow spots on leaves                            |
| INSI19150 | leaf | <i>Chenopodium</i> sp.      | Chenopodiaceae | yellow spots on leaves                            |
| INSI19157 | leaf | <i>Erigeron annuus</i>      | Asteraceae     | necrotic lesions on leaves                        |
| INSI19158 | leaf | <i>Ranunculus repens</i>    | Ranunculaceae  | leaf mosaic                                       |
| INSI20040 | leaf | <i>Solanum lycopersicum</i> | Solanaceae     | none (asymptomatic)                               |
| INSI20041 | leaf | <i>Solanum lycopersicum</i> | Solanaceae     | none (asymptomatic)                               |
| INSI20042 | leaf | <i>Solanum lycopersicum</i> | Solanaceae     | none (asymptomatic)                               |
| INSI20043 | leaf | <i>Solanum lycopersicum</i> | Solanaceae     | none (asymptomatic)                               |
| INSI20044 | leaf | <i>Solanum lycopersicum</i> | Solanaceae     | none (asymptomatic)                               |

---

|    |                                      |      |                             |            |                                              |
|----|--------------------------------------|------|-----------------------------|------------|----------------------------------------------|
|    | INSI20030                            | leaf | <i>Solanum lycopersicum</i> | Solanaceae | necrotic leaf spots                          |
|    | INSI20031                            | leaf | <i>Solanum lycopersicum</i> | Solanaceae | necrotic leaf spots                          |
|    | INSI20033                            | leaf | <i>Solanum lycopersicum</i> | Solanaceae | necrotic leaf spots                          |
|    | INSI20035                            | leaf | <i>Solanum lycopersicum</i> | Solanaceae | purpling of leaf lamina                      |
|    | INSI20036                            | leaf | <i>Solanum lycopersicum</i> | Solanaceae | interveinal leaf yellowing                   |
|    | INSI20037                            | leaf | <i>Solanum lycopersicum</i> | Solanaceae | necrotic leaf spots, necrosis on leaf lamina |
|    | INSI20038                            | leaf | <i>Solanum lycopersicum</i> | Solanaceae | necrotic leaf spots, necrosis on leaf lamina |
|    | INSI20055                            | leaf | <i>Solanum lycopersicum</i> | Solanaceae | purpling of leaf lamina                      |
|    | INSI20108                            | leaf | <i>Solanum lycopersicum</i> | Solanaceae | leaf deformation                             |
|    | INSI20126                            | leaf | <i>Solanum lycopersicum</i> | Solanaceae | necrotic leaf spots                          |
|    | INSI20127                            | leaf | <i>Solanum lycopersicum</i> | Solanaceae | necrotic leaf spots, necrosis on leaf lamina |
|    | INSI20128                            | leaf | <i>Solanum lycopersicum</i> | Solanaceae | necrotic leaf spots, necrosis on leaf lamina |
|    | INSI20129                            | leaf | <i>Solanum lycopersicum</i> | Solanaceae | necrotic leaf spots, necrosis on leaf lamina |
|    | INSI20132                            | leaf | <i>Solanum lycopersicum</i> | Solanaceae | leaf deformation and dwarfing                |
| 36 | Taraxacum viroid-like circular RNA 1 | leaf | <i>Taraxacum officinale</i> | Asteraceae | interveinal leaf chlorosis                   |

---
