# Supplementary material
Source: PubMed Central journal article supplement (PMC10044381)
Supplement: 40168_2023_1500_MOESM5_ESM.pdf [file 40168_2023_1500_MOESM5_ESM.pdf]

# **In-depth study of tomato and weed viromes reveals undiscovered plant virus diversity in an agroecosystem**

Rivarez, MPS<sup>1,2,\*</sup>, Pecman, A<sup>1,2</sup>, Bačnik, K<sup>1,2</sup>, Maksimović Carvalho Ferreira, O<sup>1,2</sup>, Vučurović, A<sup>1</sup>, Seljak, G<sup>1</sup>, Mehle, N<sup>1,3</sup>, Gutiérrez-Aguirre, I<sup>1</sup>, Ravnikar, M<sup>1</sup>, and Kutnjak, D<sup>1,\*</sup>

<sup>1</sup>Department of Biotechnology and Systems Biology, National Institute of Biology, Večna pot 111, Ljubljana, 1000 Slovenia. <sup>2</sup>Jožef Stefan International Postgraduate School, Jamova cesta 39, Ljubljana, 1000 Slovenia. <sup>3</sup>School for Viticulture and Enology, University of Nova Gorica, Dvorec Lanthieri Glavni trg 8, Vipava, 5271 Slovenia. \*for correspondence email Denis Kutnjak ([denis.kutnjak@nib.si](mailto:denis.kutnjak@nib.si)) and Mark Paul Selda Rivarez ([mpsrivarez@gmail.com](mailto:mpsrivarez@gmail.com))

## **SUPPLEMENTARY INFORMATION**

### **Additional File 05**

**Supplementary Figure 3.** Representative field photos of confirmed associated plant hosts of selected viruses and putative viroids.

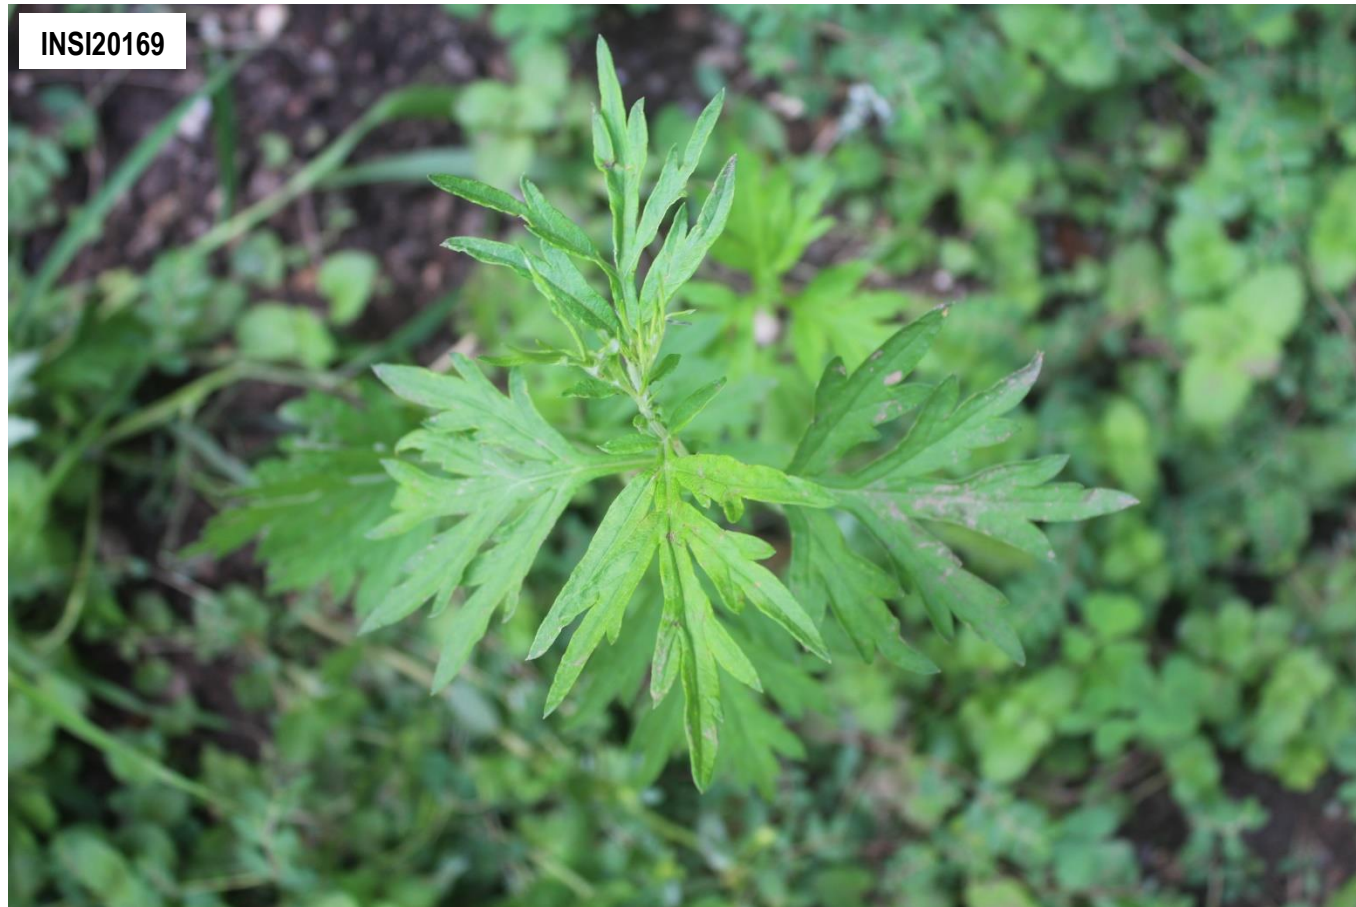

**Supplementary Figure 3-01.** Artermisia fimovirus 1. The confirmed associated plant host(s) shown is/are *Artemisia verlotiorum* (Asteraceae).

**Supplementary Figure 3.** Representative field photos of confirmed associated plant hosts of selected viruses and putative viroids. **Note:** There are other viruses detected in the sequencing pools (*i.e.* composite sample) where the samples shown belong, which implies possible co-infection of viruses on the specific sample shown. Thus, it is difficult to associate the symptom phenotype with the detection of a single specific virus. Complete information on the individual samples can be found in Supplementary Table 1 and the description of symptoms of the associated plant hosts are summarized in Supplementary Table 9.

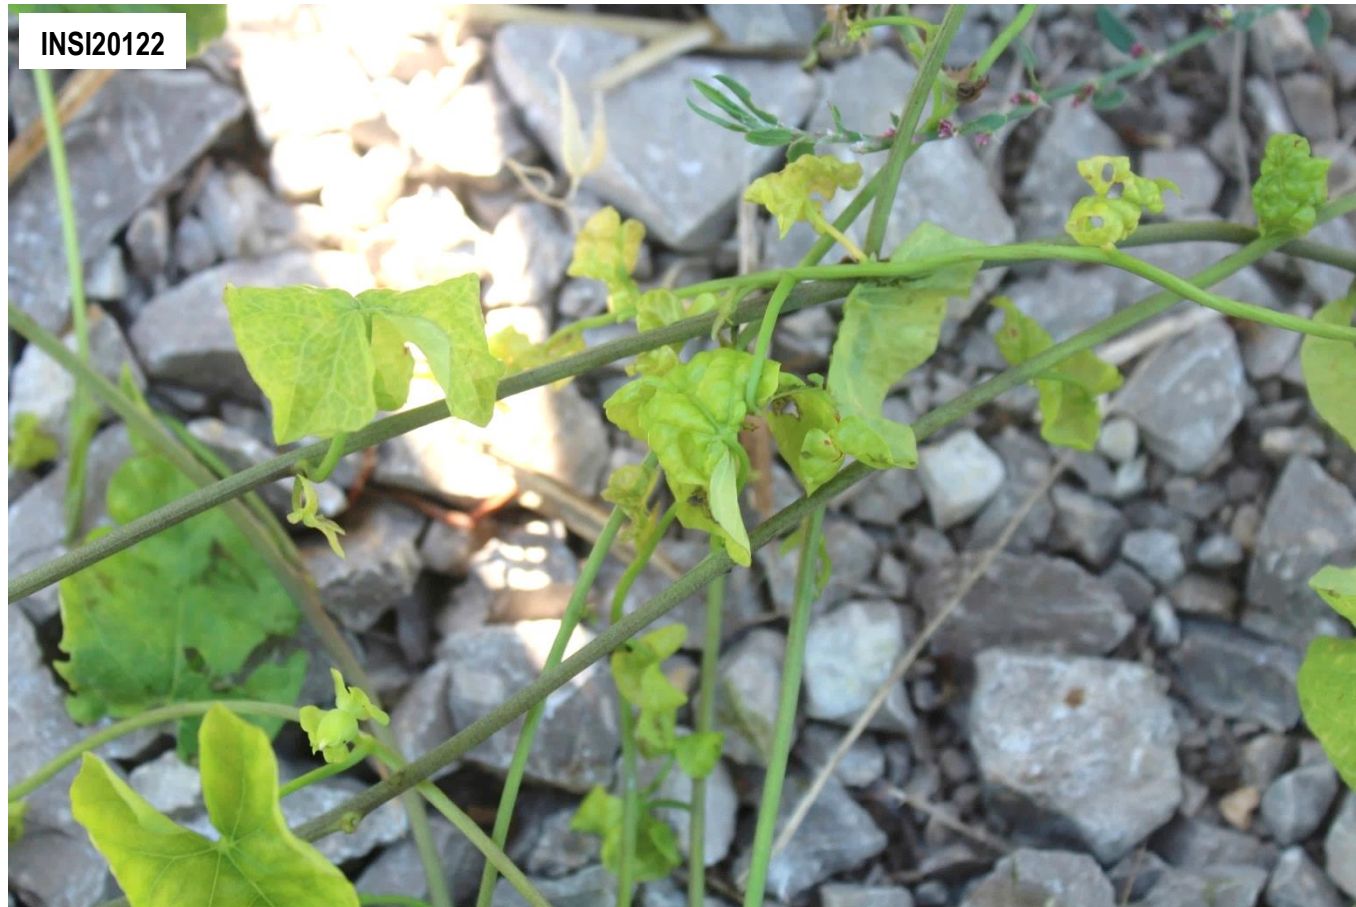

**Supplementary Figure 3-02.** Calystegia geminivirus 1 and Calystegia pelarspovirus 1. The confirmed associated plant host(s) shown is/are *Calystegia* sp. (Convolvulaceae).

**Supplementary Figure 3** (continued). Representative field photos of confirmed associated plant hosts of selected viruses and putative viroids. **Note:** There are other viruses detected in the sequencing pools (*i.e.* composite sample) where the samples shown belong, which implies possible co-infection of viruses on the specific sample shown. Thus, it is difficult to associate the symptom phenotype with the detection of a single specific virus. Complete information on the individual samples can be found in Supplementary Table 1 and the description of symptoms of the associated plant hosts are summarized in Supplementary Table 9.



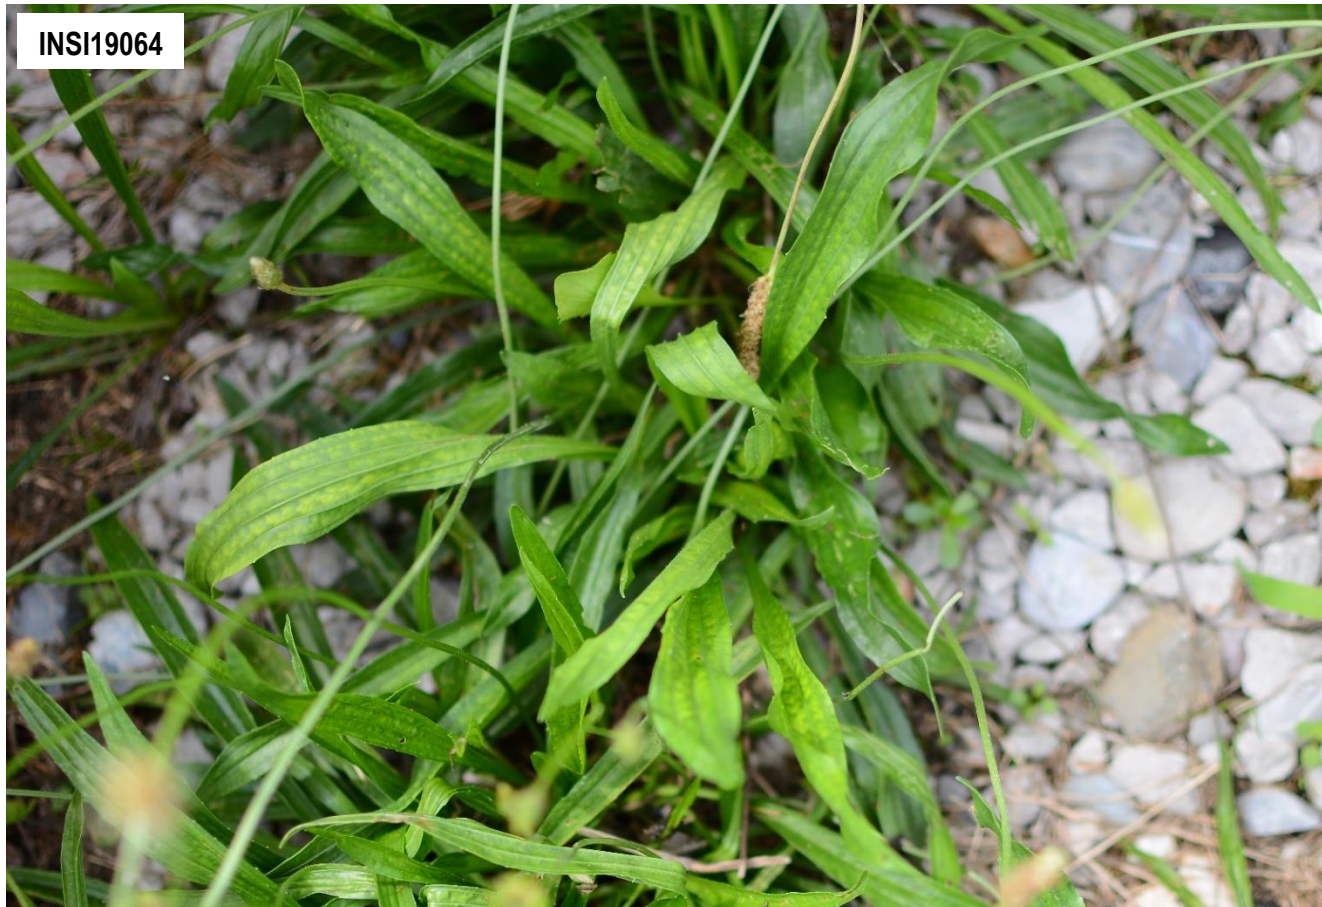

**Supplementary Figure 3-03.** Plantago potyvirus 1. The confirmed associated plant host(s) shown is/are *Plantago lanceolata* (Plantaginaceae).

**Supplementary Figure 3** (continued). Representative field photos of confirmed associated plant hosts of selected viruses and putative viroids. **Note:** There are other viruses detected in the sequencing pools (*i.e.* composite sample) where the samples shown belong, which implies possible co-infection of viruses on the specific sample shown. Thus, it is difficult to associate the symptom phenotype with the detection of a single specific virus. Complete information on the individual samples can be found in Supplementary Table 1 and the description of symptoms of the associated plant hosts are summarized in Supplementary Table 9.

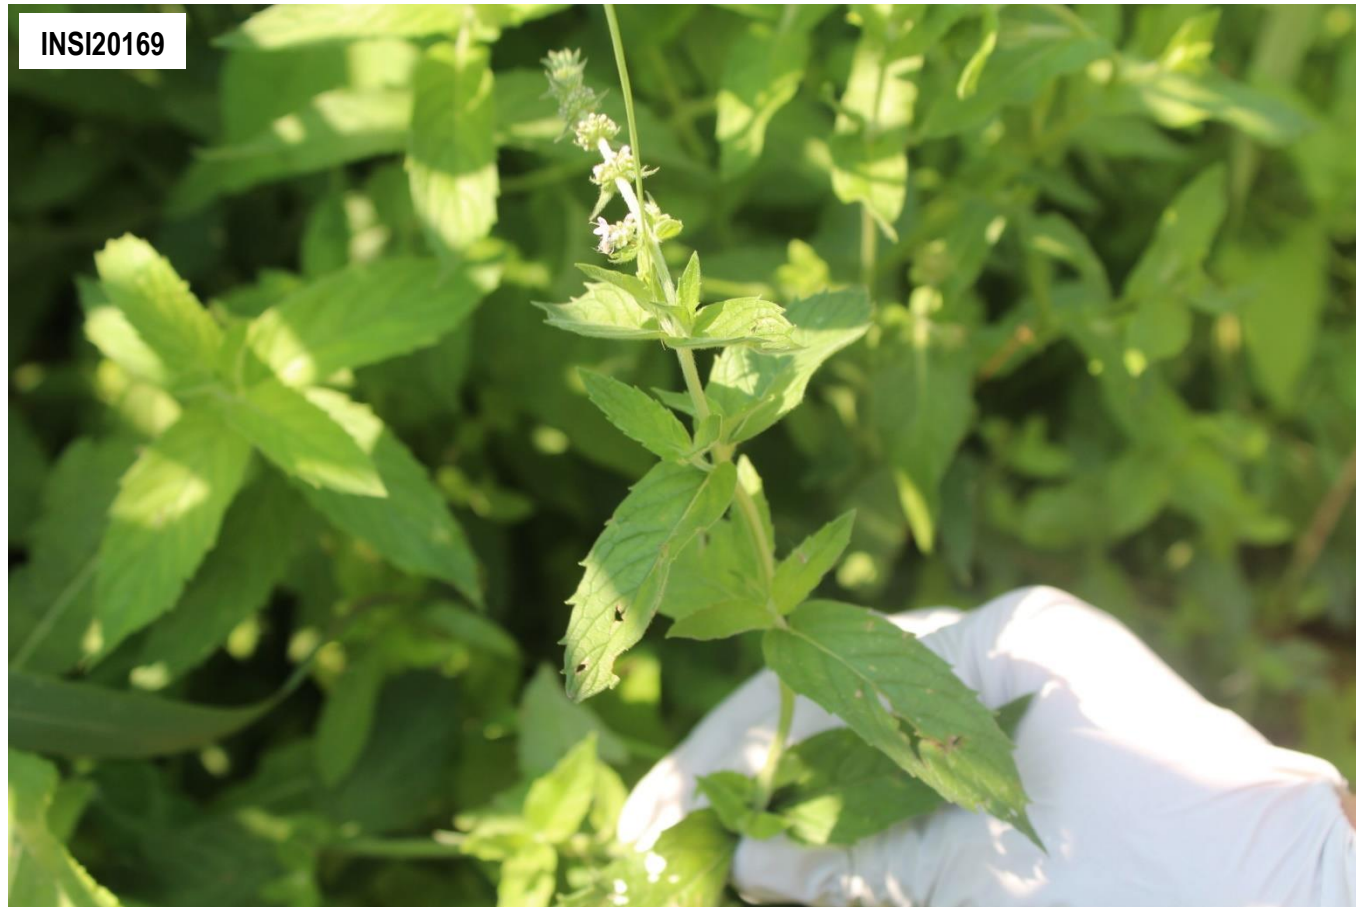

**Supplementary Figure 3-04.** *Mentha macluravirus* 1. The confirmed associated plant host(s) shown is/are *Mentha spicata* (Lamiaceae).

**Supplementary Figure 3** (continued). Representative field photos of confirmed associated plant hosts of selected viruses and putative viroids. **Note:** There are other viruses detected in the sequencing pools (*i.e.* composite sample) where the samples shown belong, which implies possible co-infection of viruses on the specific sample shown. Thus, it is difficult to associate the symptom phenotype with the detection of a single specific virus. Complete information on the individual samples can be found in Supplementary Table 1 and the description of symptoms of the associated plant hosts are summarized in Supplementary Table 9.



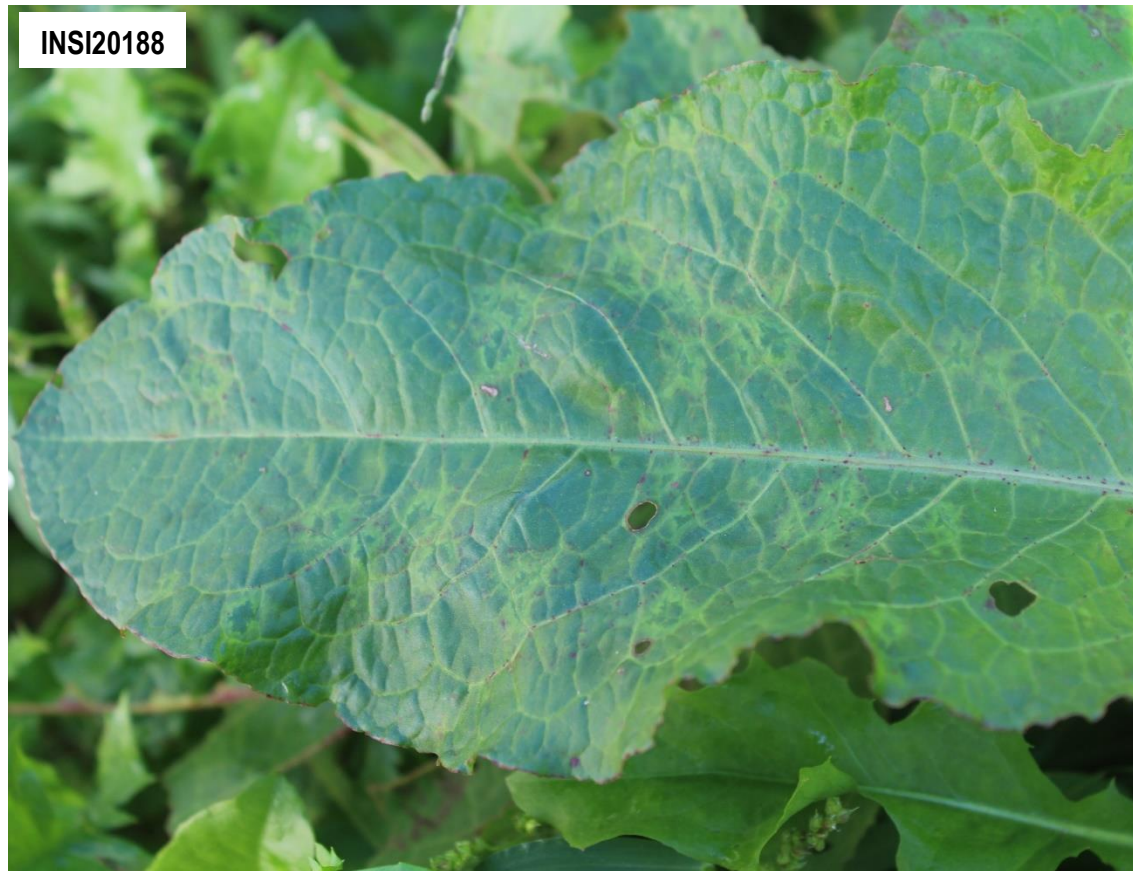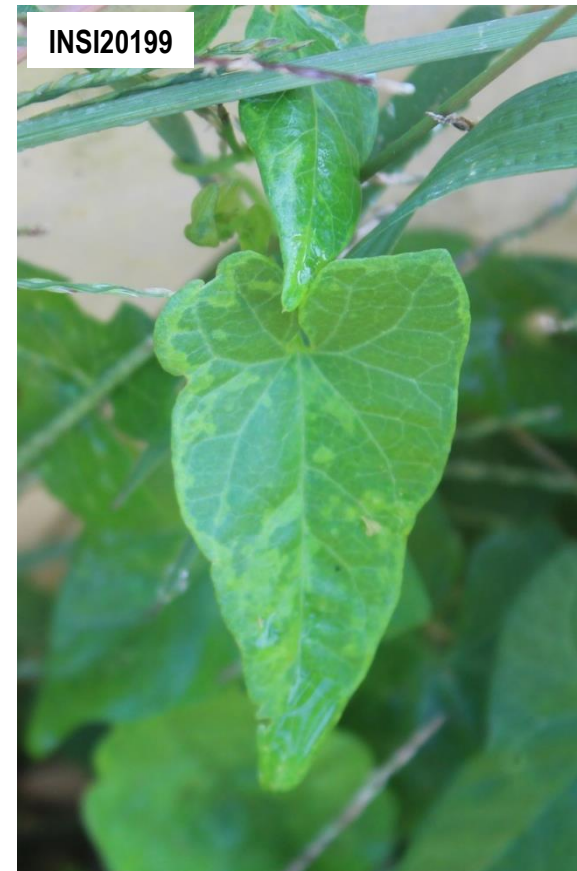

**Supplementary Figure 3-05.** *Rumex potyvirus 1*. The confirmed associated plant host(s) shown is/are *Rumex* sp. (Polygonaceae) (INSI20188) and *Convolvulus* sp. (Convolvulaceae) (INSI20199).

**Supplementary Figure 3** (continued). Representative field photos of confirmed associated plant hosts of selected viruses and putative viroids. **Note:** There are other viruses detected in the sequencing pools (*i.e.* composite sample) where the samples shown belong, which implies possible co-infection of viruses on the specific sample shown. Thus, it is difficult to associate the symptom phenotype with the detection of a single specific virus. Complete information on the individual samples can be found in Supplementary Table 1 and the description of symptoms of the associated plant hosts are summarized in Supplementary Table 9.

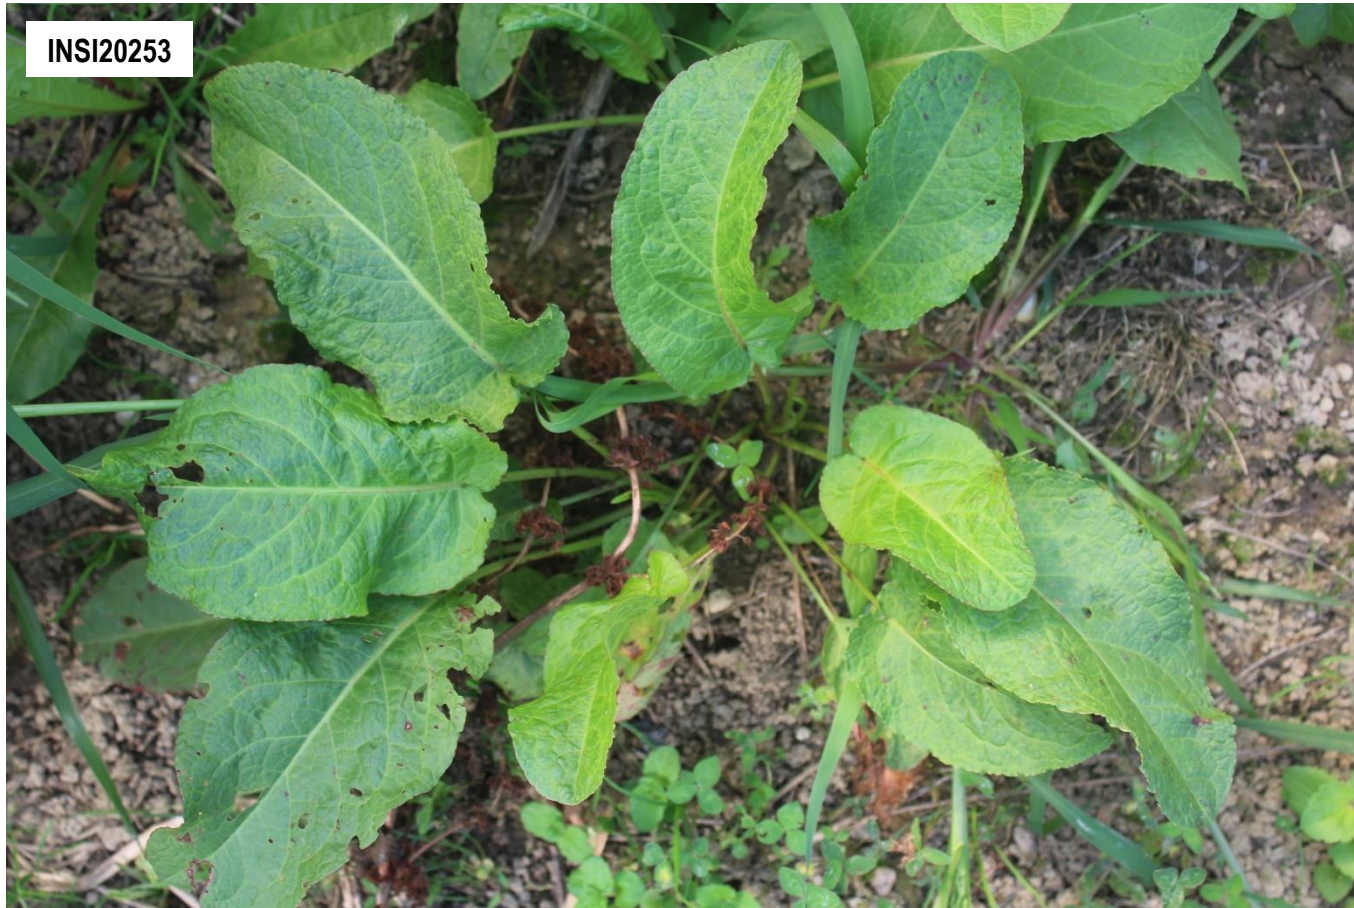

**Supplementary Figure 3-06.** Broad-leaved dock virus A, isolate 2. The confirmed associated plant host(s) shown is/are *Rumex crispus* (Polygonaceae).

**Supplementary Figure 3** (continued). Representative field photos of confirmed associated plant hosts of selected viruses and putative viroids. **Note:** There are other viruses detected in the sequencing pools (*i.e.* composite sample) where the samples shown belong, which implies possible co-infection of viruses on the specific sample shown. Thus, it is difficult to associate the symptom phenotype with the detection of a single specific virus. Complete information on the individual samples can be found in Supplementary Table 1 and the description of symptoms of the associated plant hosts are summarized in Supplementary Table 9.



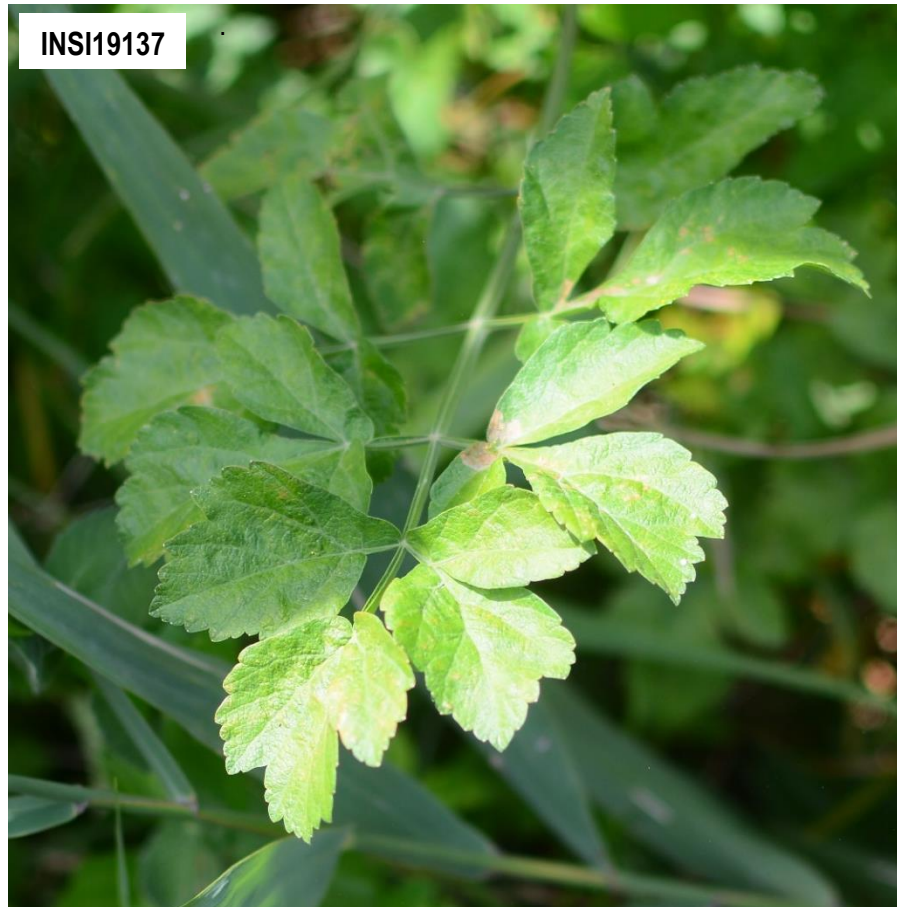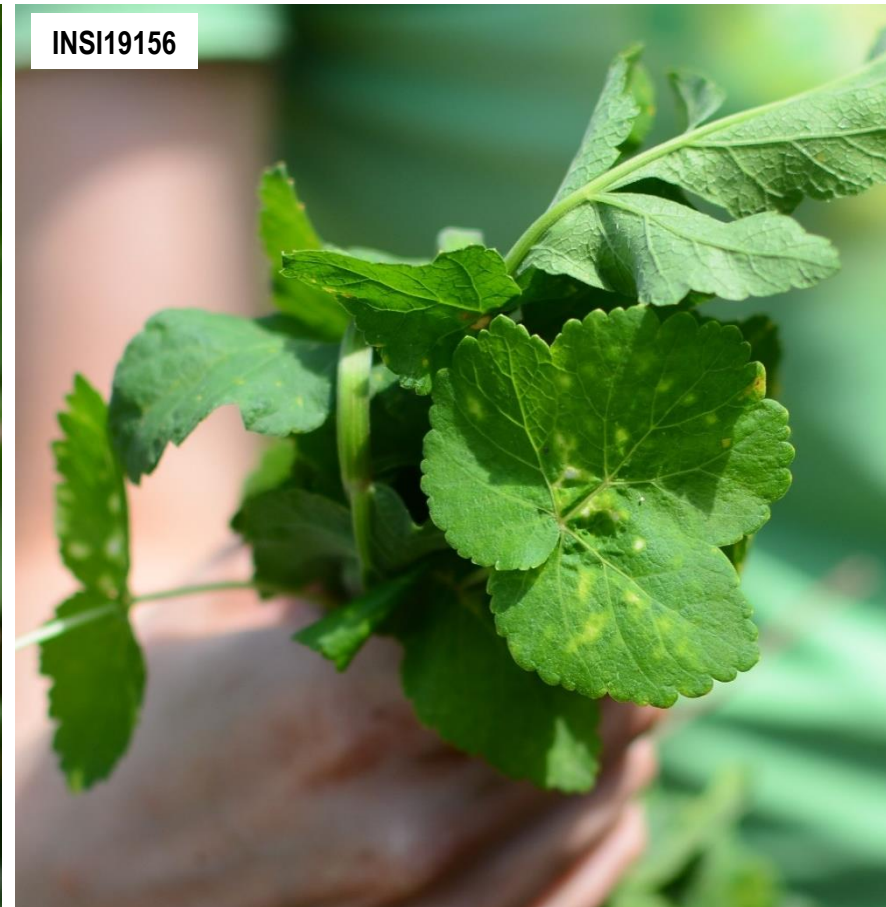

**Supplementary Figure 3-07.** *Pastinaca umbravirus* 1. The confirmed associated plant host(s) shown is/are *Pastinaca sativa* (Apiaceae). Sample INSI19137 is also the confirmed associated plant host of *Pastinaca potexvirus* 1 and *Pastinaca cytorhabdovirus* 1.

**Supplementary Figure 3** (continued). Representative field photos of confirmed associated plant hosts of selected viruses and putative viroids. **Note:** There are other viruses detected in the sequencing pools (*i.e.* composite sample) where the samples shown belong, which implies possible co-infection of viruses on the specific sample shown. Thus, it is difficult to associate the symptom phenotype with the detection of a single specific virus. Complete information on the individual samples can be found in Supplementary Table 1 and the description of symptoms of the associated plant hosts are summarized in Supplementary Table 9.



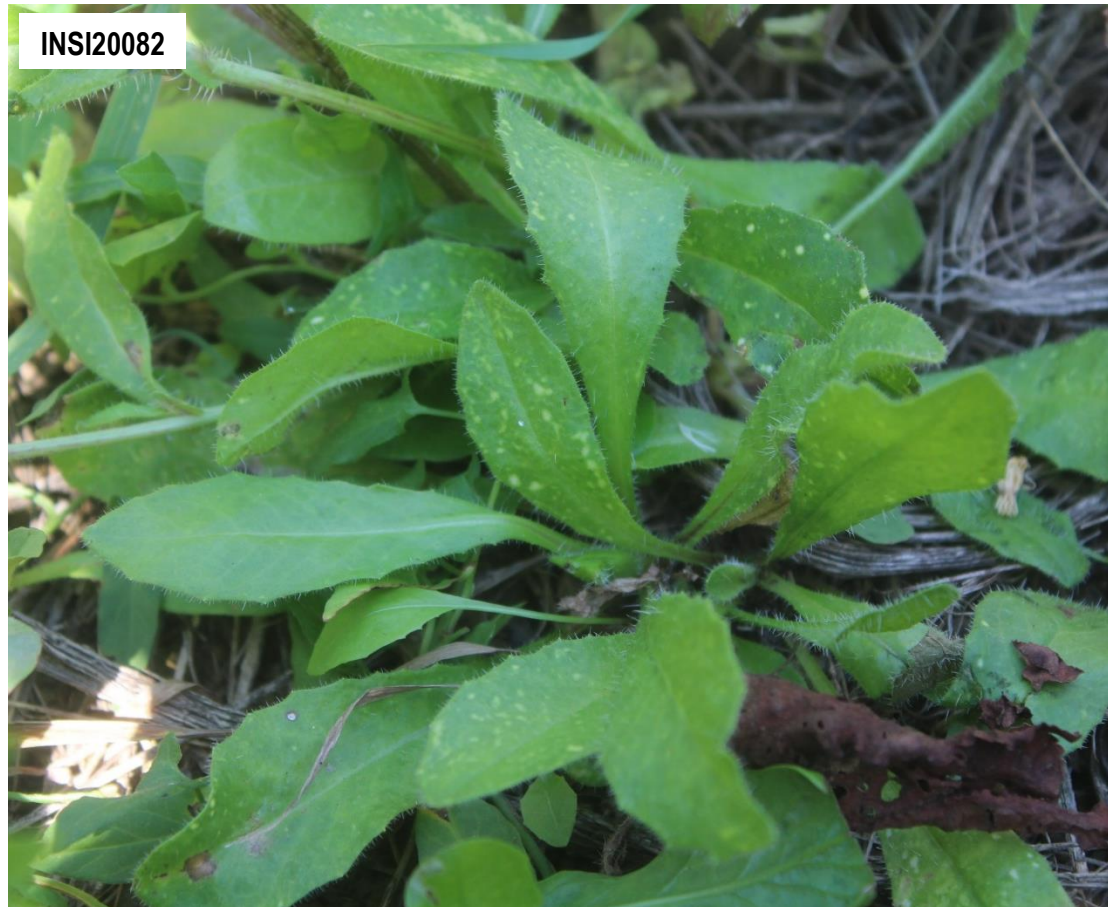

**Supplementary Figure 3-08.** *Picris umbravirus* 1. The confirmed associated plant host(s) shown is/are *Picris echoides* (Asteraceae). The sample shown is also confirmed associated host of *Cichorium alphacarmovirus* 1 and *Picris cytorhabdovirus* 1.

**Supplementary Figure 3** (continued). Representative field photos of confirmed associated plant hosts of selected viruses and putative viroids. **Note:** There are other viruses detected in the sequencing pools (*i.e.* composite sample) where the samples shown belong, which implies possible co-infection of viruses on the specific sample shown. Thus, it is difficult to associate the symptom phenotype with the detection of a single specific virus. Complete information on the individual samples can be found in Supplementary Table 1 and the description of symptoms of the associated plant hosts are summarized in Supplementary Table 9.

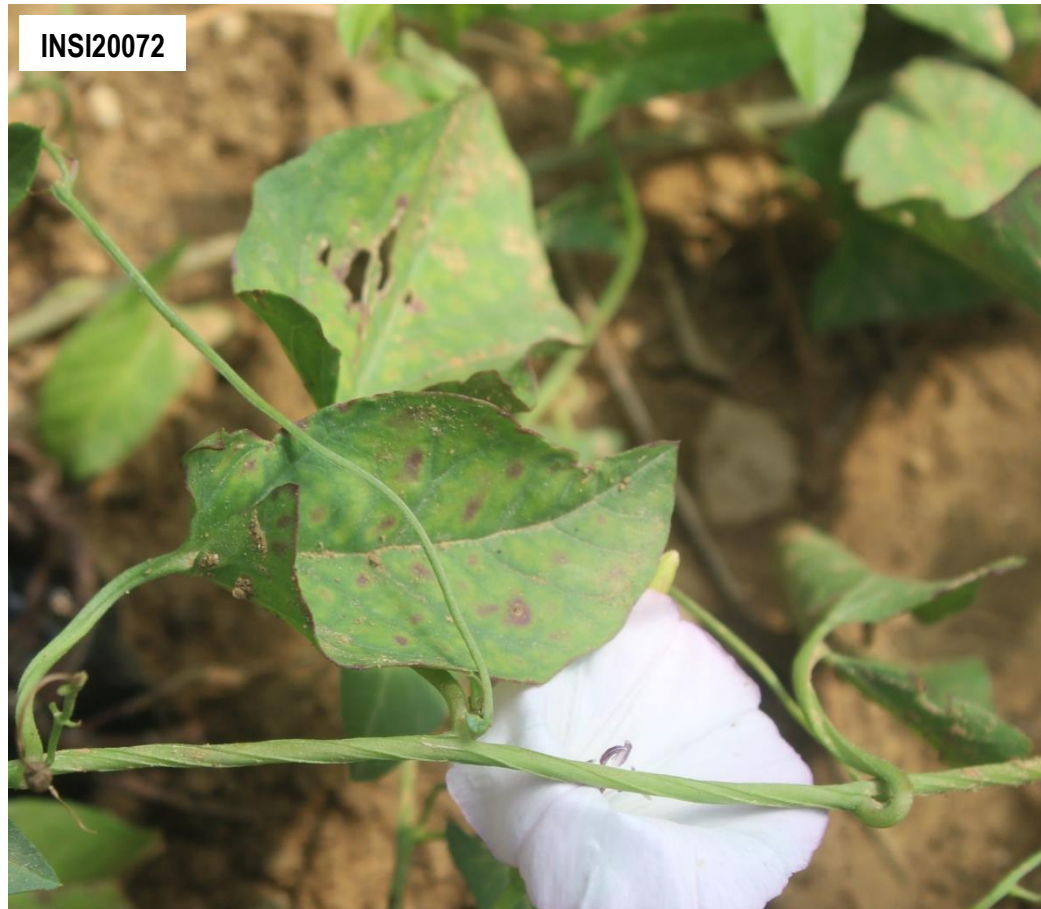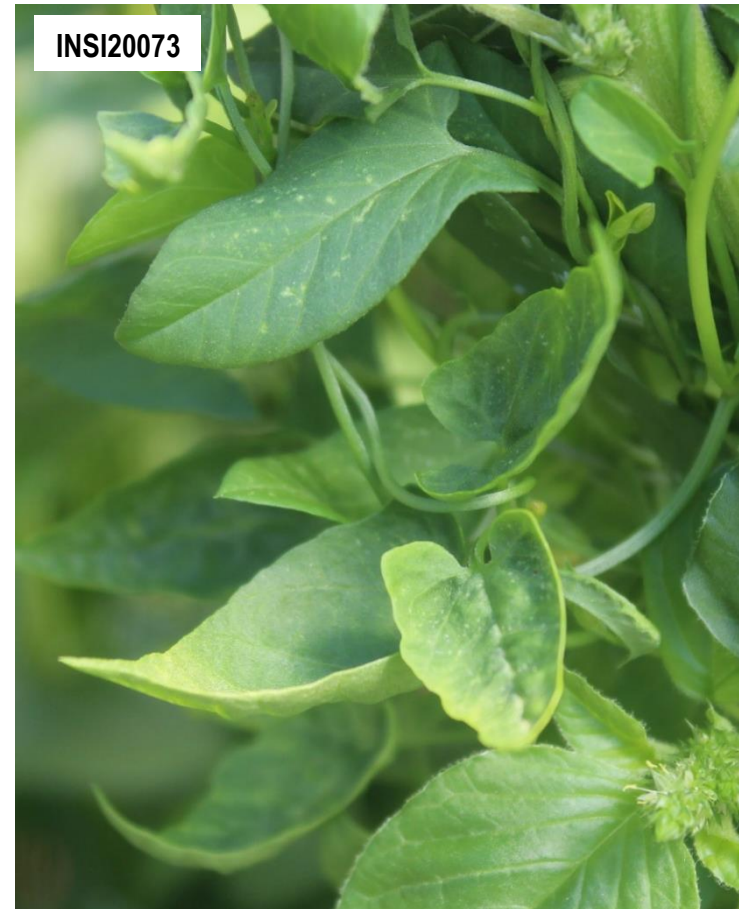

**Supplementary Figure 3-09.** Convolvulus aureusvirus 1. The confirmed associated plant host(s) shown is/are *Convolvulus arvensis* (Convolvulaceae).

**Supplementary Figure 3** (continued). Representative field photos of confirmed associated plant hosts of selected viruses and putative viroids. **Note:** There are other viruses detected in the sequencing pools (*i.e.* composite sample) where the samples shown belong, which implies possible co-infection of viruses on the specific sample shown. Thus, it is difficult to associate the symptom phenotype with the detection of a single specific virus. Complete information on the individual samples can be found in Supplementary Table 1 and the description of symptoms of the associated plant hosts are summarized in Supplementary Table 9.



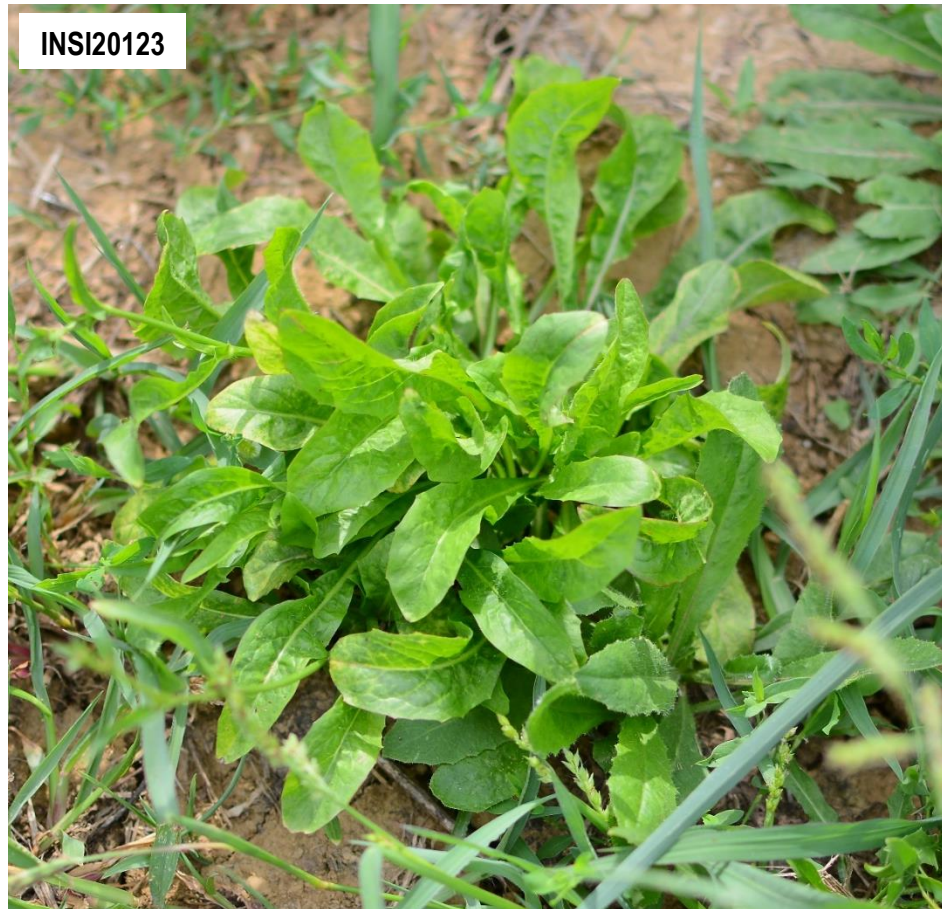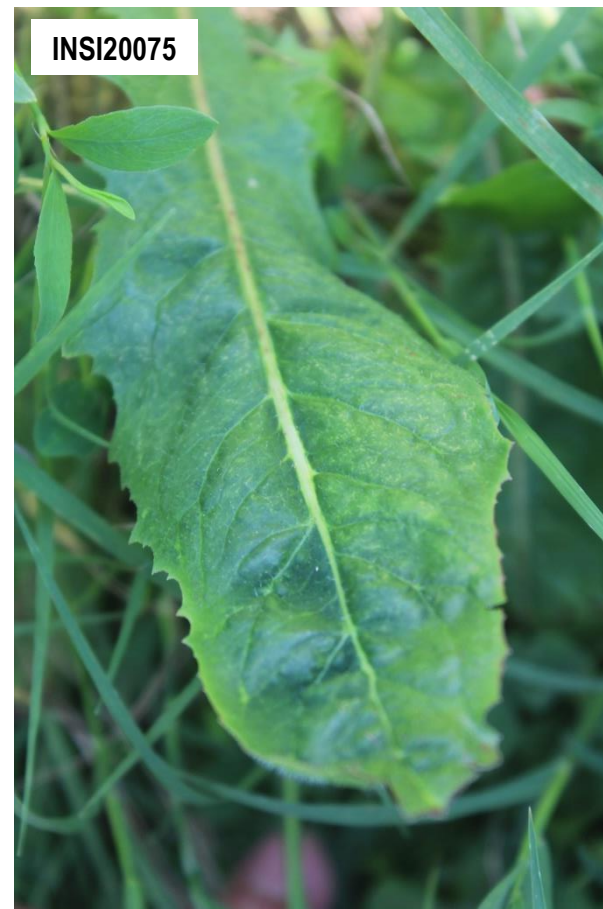

**Supplementary Figure 3-10.** Cichorium alphacarmovirus 1. The confirmed associated plant host(s) shown is/are *Calystegia* sp. (Convolvulaceae).

**Supplementary Figure 3** (continued). Representative field photos of confirmed associated plant hosts of selected viruses and putative viroids. **Note:** There are other viruses detected in the sequencing pools (*i.e.* composite sample) where the samples shown belong, which implies possible co-infection of viruses on the specific sample shown. Thus, it is difficult to associate the symptom phenotype with the detection of a single specific virus. Complete information on the individual samples can be found in Supplementary Table 1 and the description of symptoms of the associated plant hosts are summarized in Supplementary Table 9.

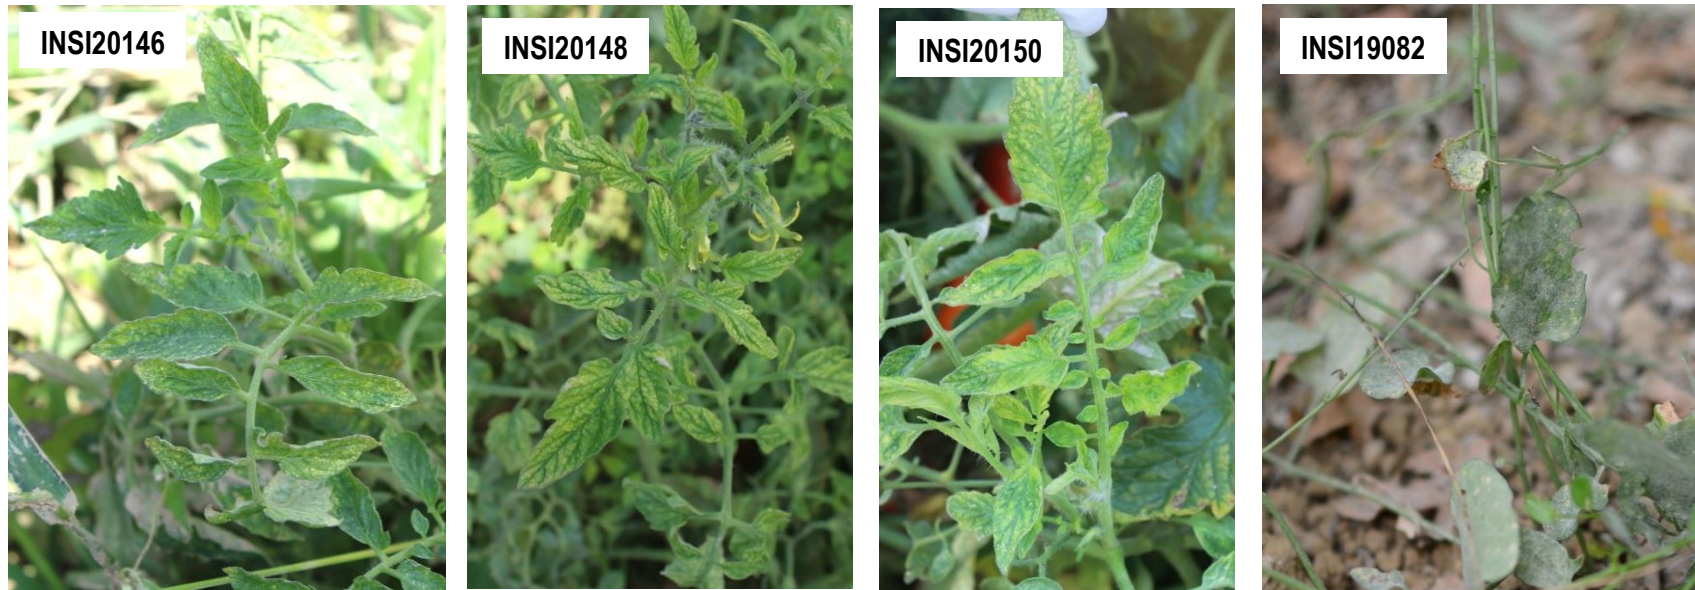

**Supplementary FigureS3-11.** Plant associated tobamo-like virus 1. The confirmed associated plant host(s) shown is/are *Solanum lycopersicum* (Solanaceae) (INSI20146, INSI20148, INSI20150) and *Convolvulus arvensis* (Convolvulaceae) (INSI19082).

**Supplementary Figure 3** (continued). Representative field photos of confirmed associated plant hosts of selected viruses and putative viroids. **Note:** There are other viruses detected in the sequencing pools (*i.e.* composite sample) where the samples shown belong, which implies possible co-infection of viruses on the specific sample shown. Thus, it is difficult to associate the symptom phenotype with the detection of a single specific virus. Complete information on the individual samples can be found in Supplementary Table 1 and the description of symptoms of the associated plant hosts are summarized in Supplementary Table 9.



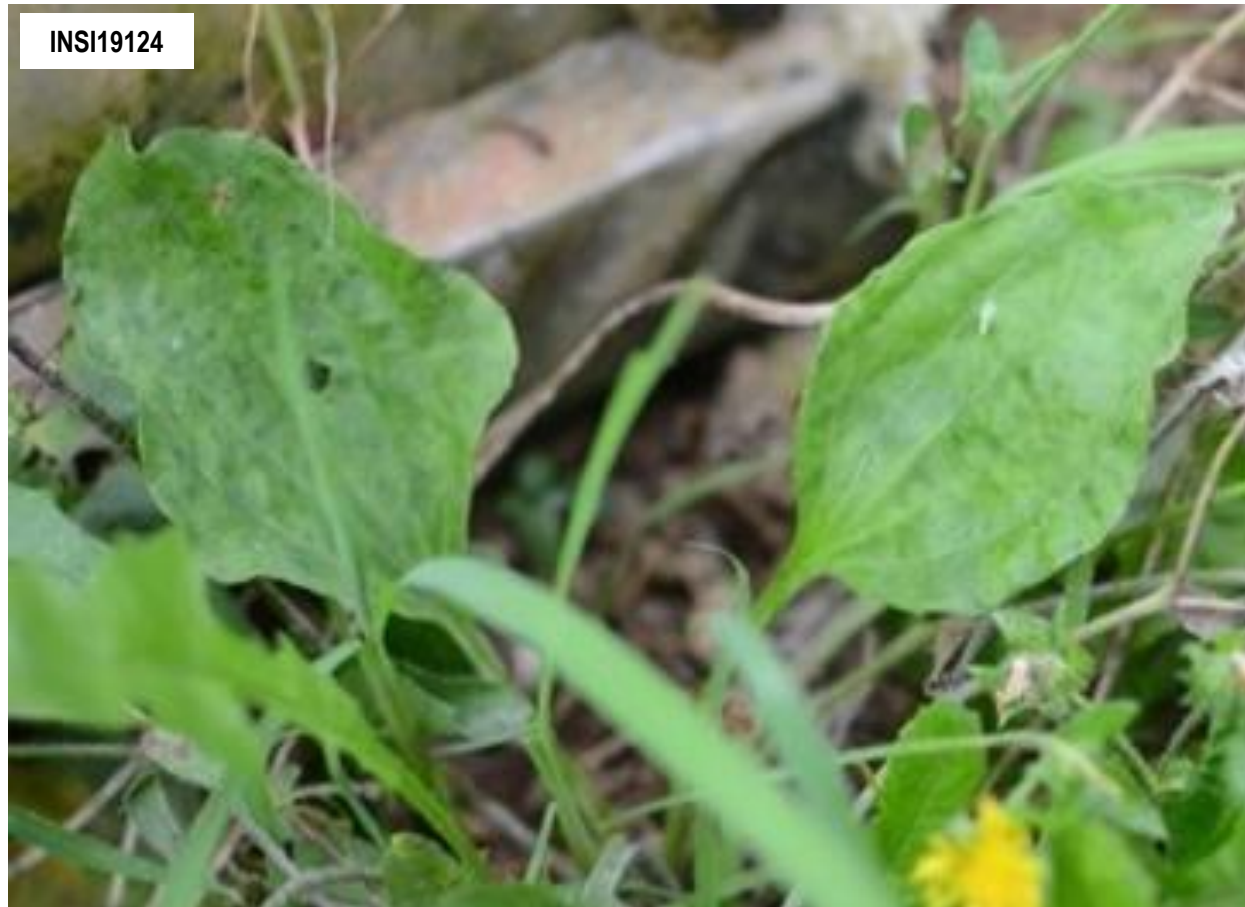

**Supplementary Figure 3-12.** *Plantago tobamovirus 1*. The confirmed associated plant host shown is *Plantago major* (Plantaginaceae).

**Supplementary Figure 3** (continued). Representative field photos of confirmed associated plant hosts of selected viruses and putative viroids. **Note:** There are other viruses detected in the sequencing pools (*i.e.* composite sample) where the samples shown belong, which implies possible co-infection of viruses on the specific sample shown. Thus, it is difficult to associate the symptom phenotype with the detection of a single specific virus. Complete information on the individual samples can be found in Supplementary Table 1 and the description of symptoms of the associated plant hosts are summarized in Supplementary Table 9.

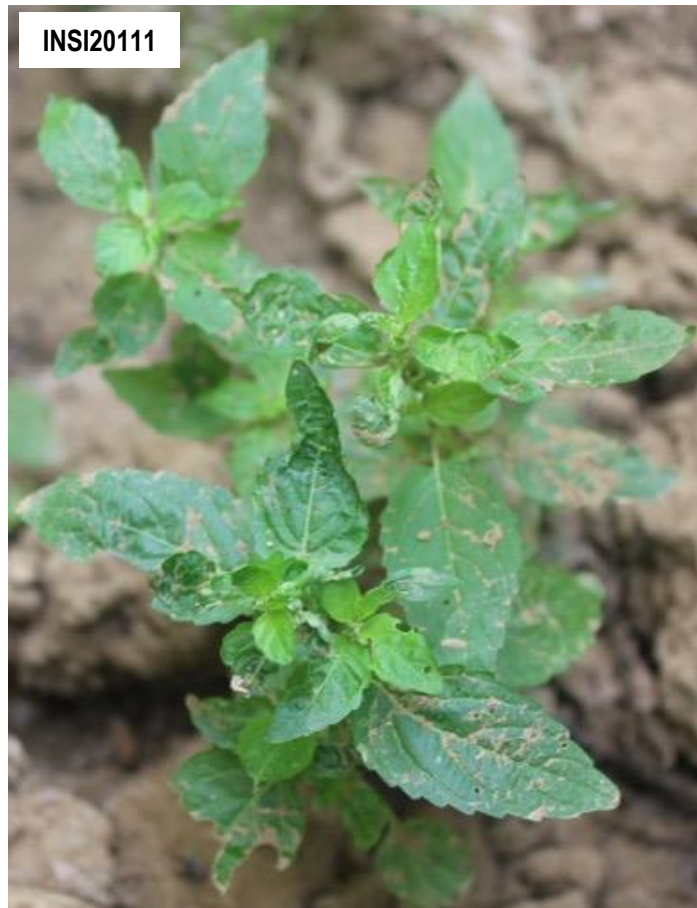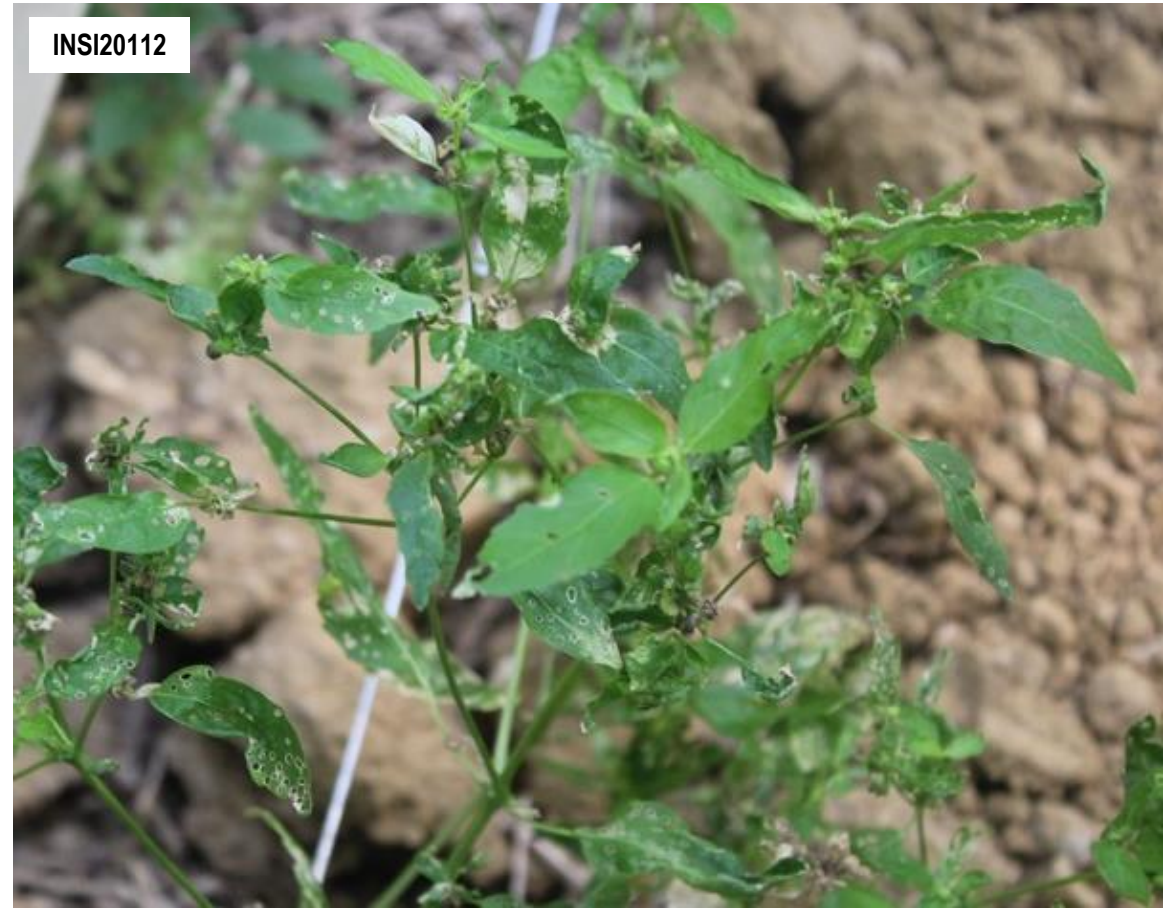

**Supplementary Figure 3-13.** *Mercurialis orthotospovirus 1*. The confirmed associated plant hosts shown are *Mercurialis annua*.

**Supplementary Figure 3** (continued). Representative field photos of confirmed associated plant hosts of selected viruses and putative viroids. **Note:** There are other viruses detected in the sequencing pools (*i.e.* composite sample) where the samples shown belong, which implies possible co-infection of viruses on the specific sample shown. Thus, it is difficult to associate the symptom phenotype with the detection of a single specific virus. Complete information on the individual samples can be found in Supplementary Table 1 and the description of symptoms of the associated plant hosts are summarized in Supplementary Table 9.



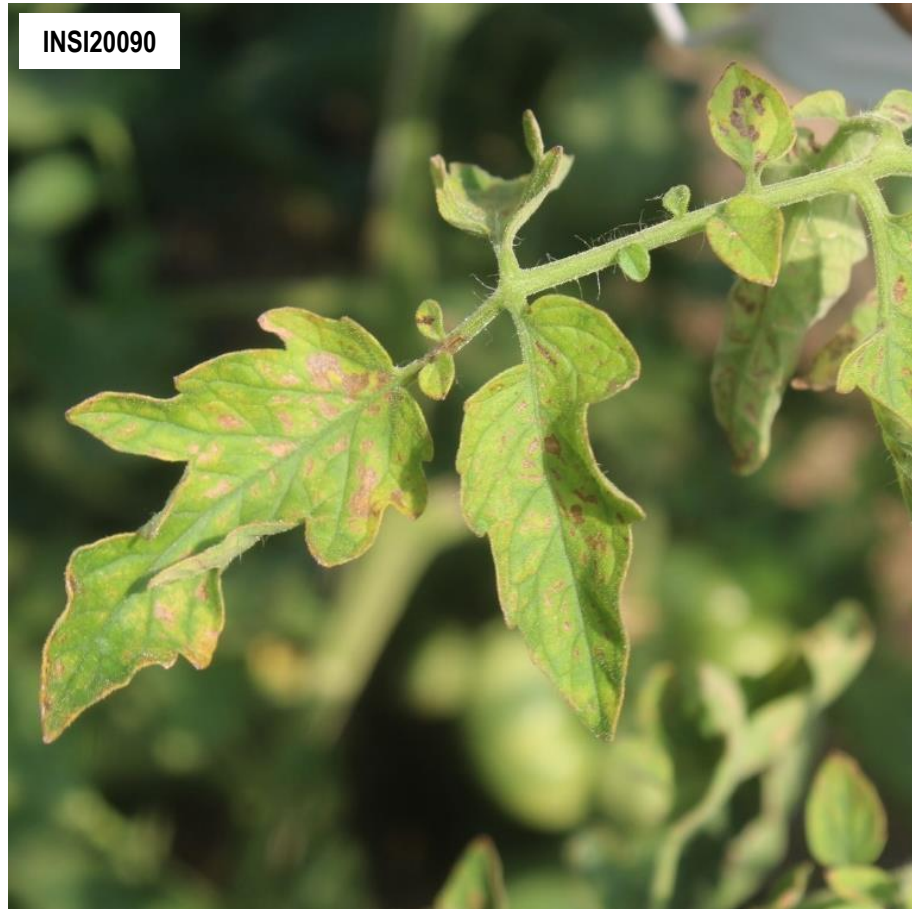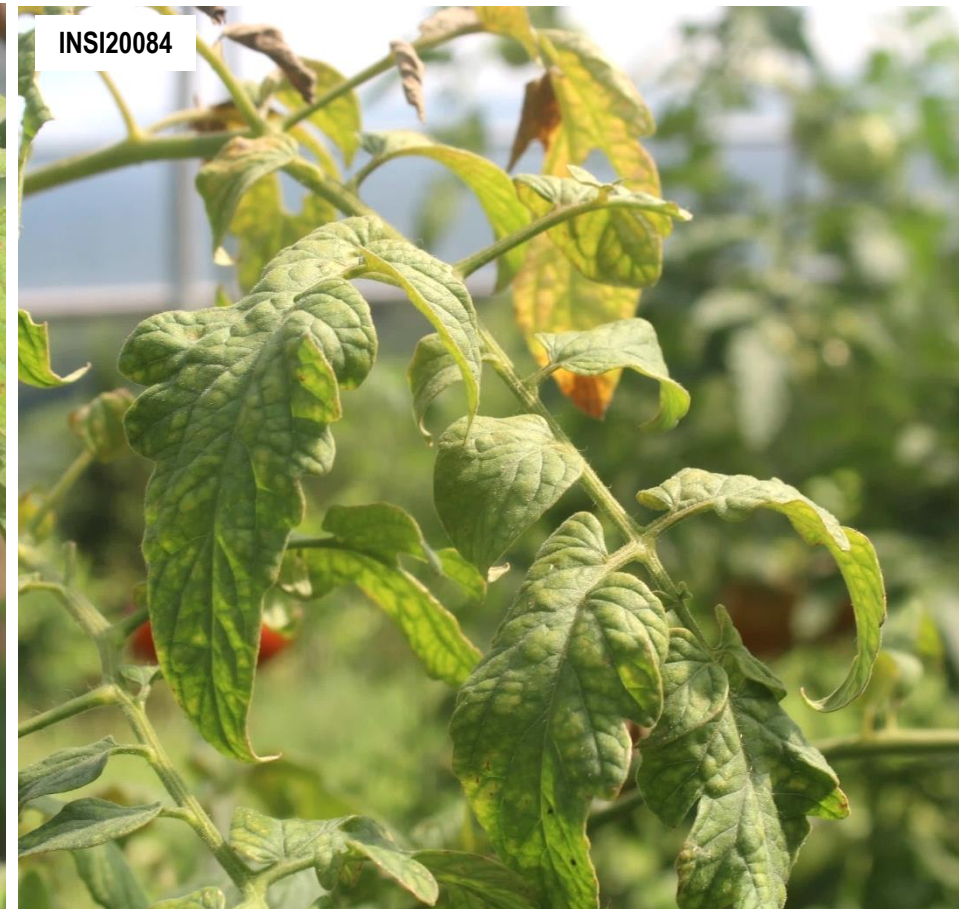

**Supplementary Figure 3-14.** Tomato associated bunya-like virus 1. The confirmed associated plant host shown is *Solanum lycopersicum*.

**Supplementary Figure 3** (continued). Representative field photos of confirmed associated plant hosts of selected viruses and putative viroids. **Note:** There are other viruses detected in the sequencing pools (*i.e.* composite sample) where the samples shown belong, which implies possible co-infection of viruses on the specific sample shown. Thus, it is difficult to associate the symptom phenotype with the detection of a single specific virus. Complete information on the individual samples can be found in Supplementary Table 1 and the description of symptoms of the associated plant hosts are summarized in Supplementary Table 9.

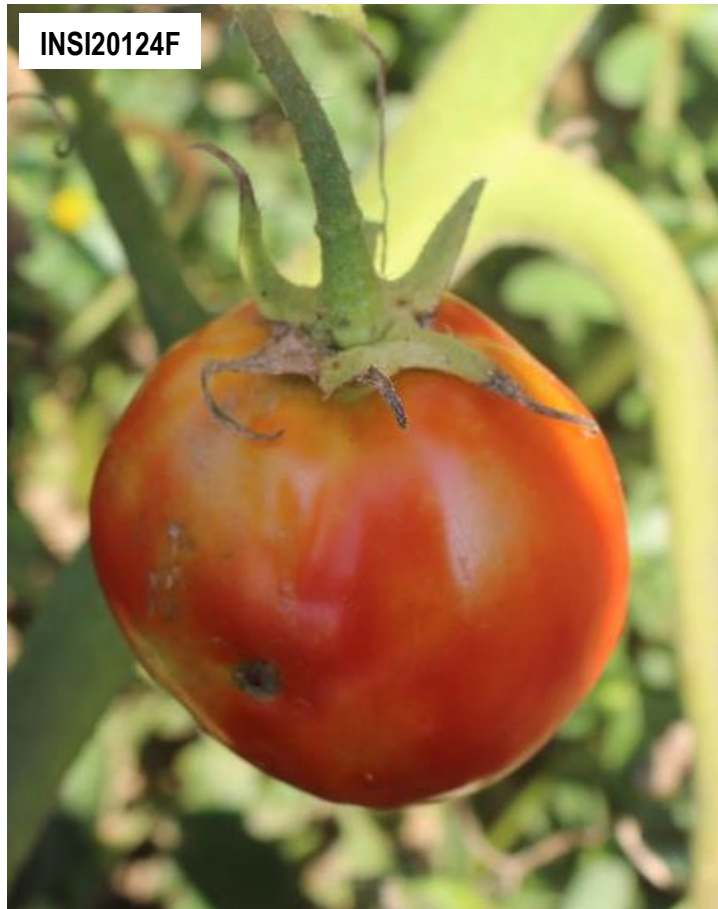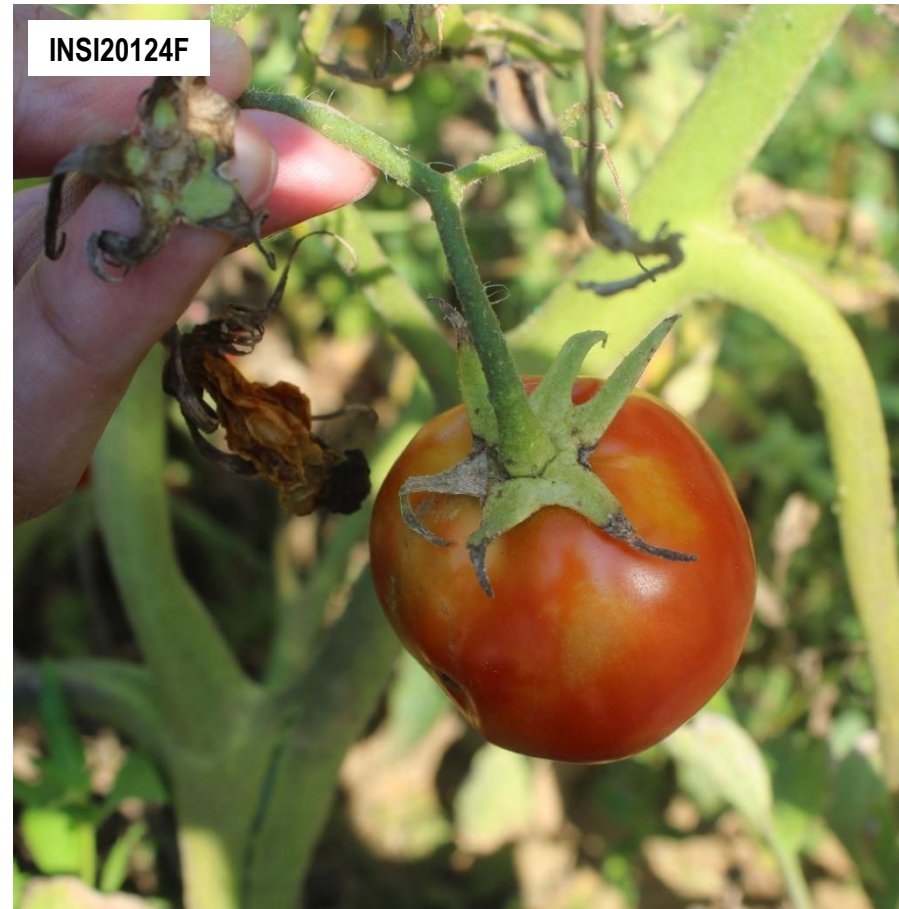

**Supplementary Figure 3-15.** Tomato vitivirus 1. The confirmed associated plant host(s) shown is/are *Solanum lycopersicum* (Solanaceae).

**Supplementary Figure 3** (continued). Representative field photos of confirmed associated plant hosts of selected viruses and putative viroids. **Note:** There are other viruses detected in the sequencing pools (*i.e.* composite sample) where the samples shown belong, which implies possible co-infection of viruses on the specific sample shown. Thus, it is difficult to associate the symptom phenotype with the detection of a single specific virus. Complete information on the individual samples can be found in Supplementary Table 1 and the description of symptoms of the associated plant hosts are summarized in Supplementary Table 9.



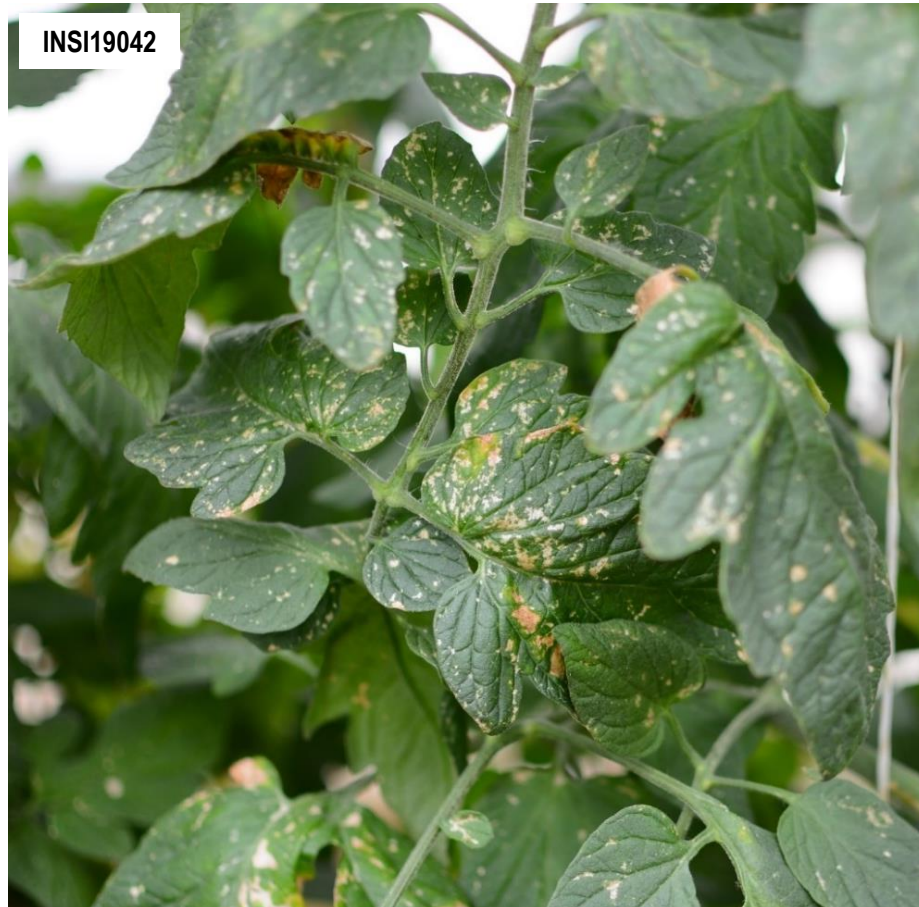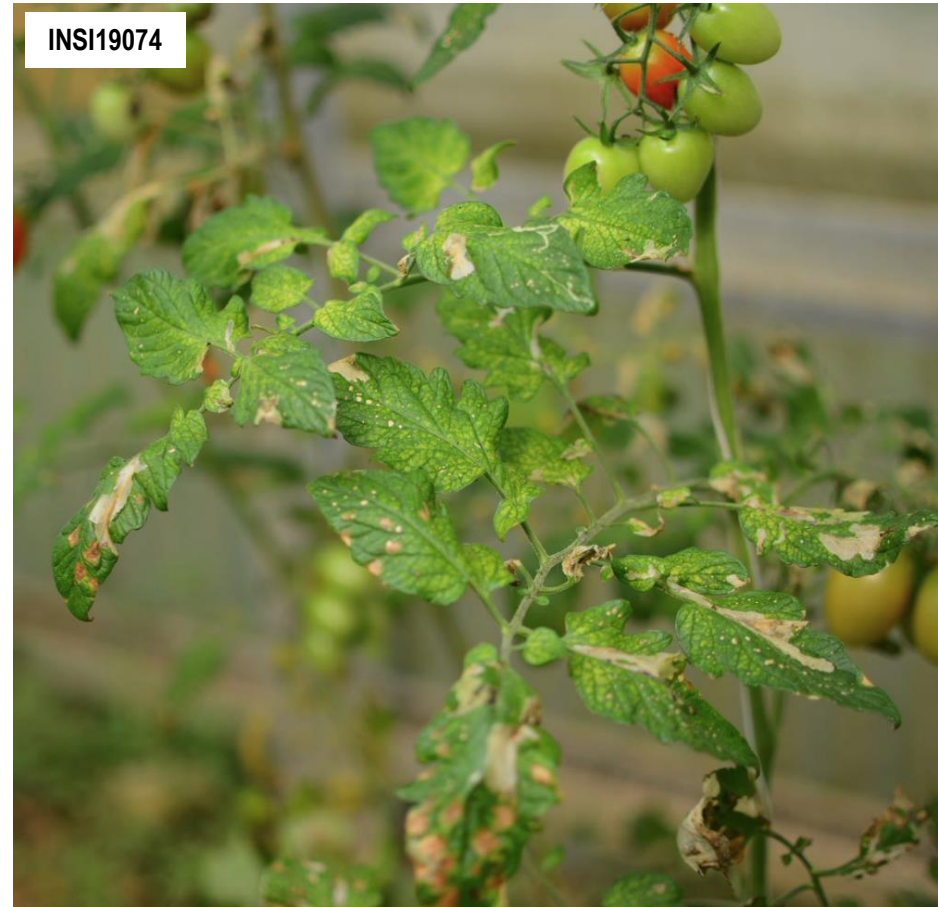

**Supplementary Figure 3-16.** Ranunculus white mottle ophiovirus. The confirmed associated plant hosts shown are tomatoes (*Solanum lycopersicum*).

**Supplementary Figure 3** (continued). Representative field photos of confirmed associated plant hosts of selected viruses and putative viroids. **Note:** There are other viruses detected in the sequencing pools (*i.e.* composite sample) where the samples shown belong, which implies possible co-infection of viruses on the specific sample shown. Thus, it is difficult to associate the symptom phenotype with the detection of a single specific virus. Complete information on the individual samples can be found in Supplementary Table 1 and the description of symptoms of the associated plant hosts are summarized in Supplementary Table 9.

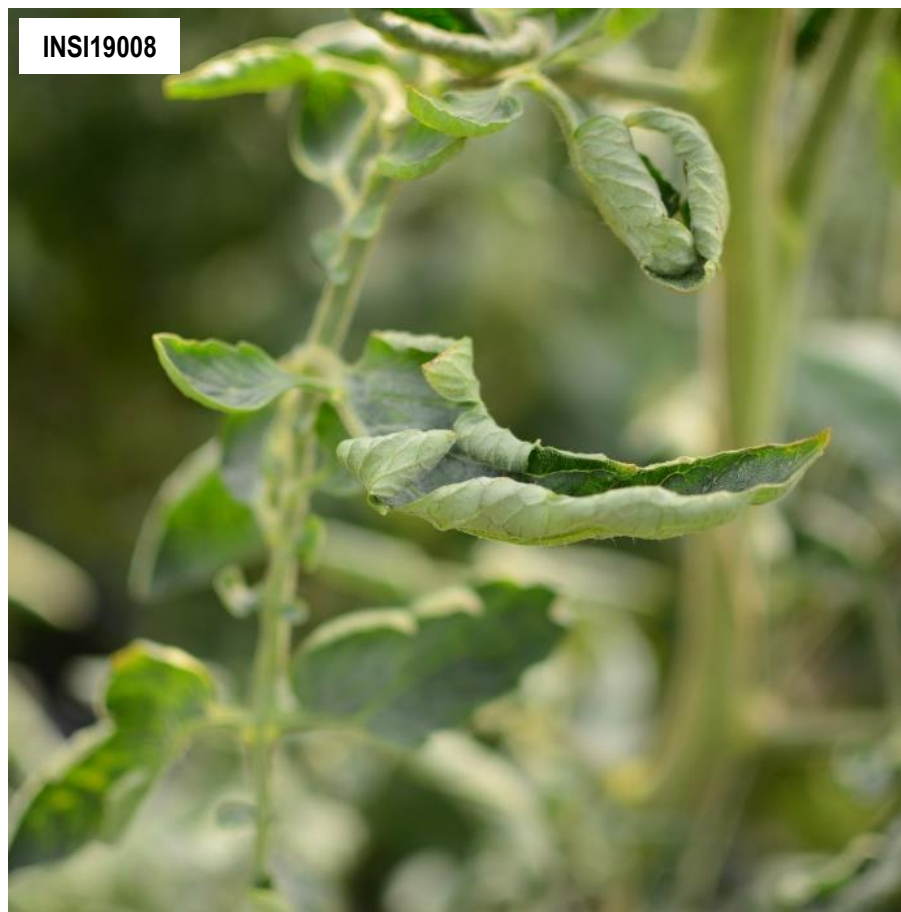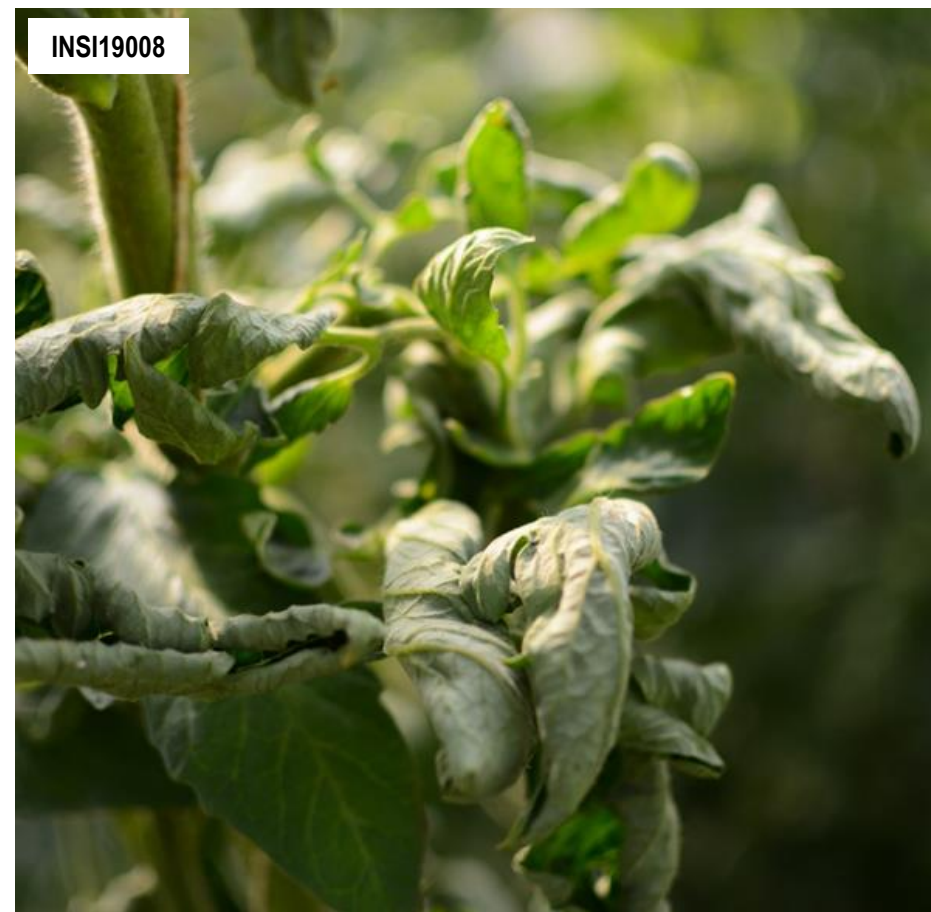

**Supplementary Figure 3-17.** Tomato betanucleorhabdovirus 1. The confirmed associated plant host shown is tomato (*Solanum lycopersicum*).

**Supplementary Figure 3** (continued). Representative field photos of confirmed associated plant hosts of selected viruses and putative viroids. **Note:** There are other viruses detected in the sequencing pools (*i.e.* composite sample) where the samples shown belong, which implies possible co-infection of viruses on the specific sample shown. Thus, it is difficult to associate the symptom phenotype with the detection of a single specific virus. Complete information on the individual samples can be found in Supplementary Table 1 and the description of symptoms of the associated plant hosts are summarized in Supplementary Table 9.



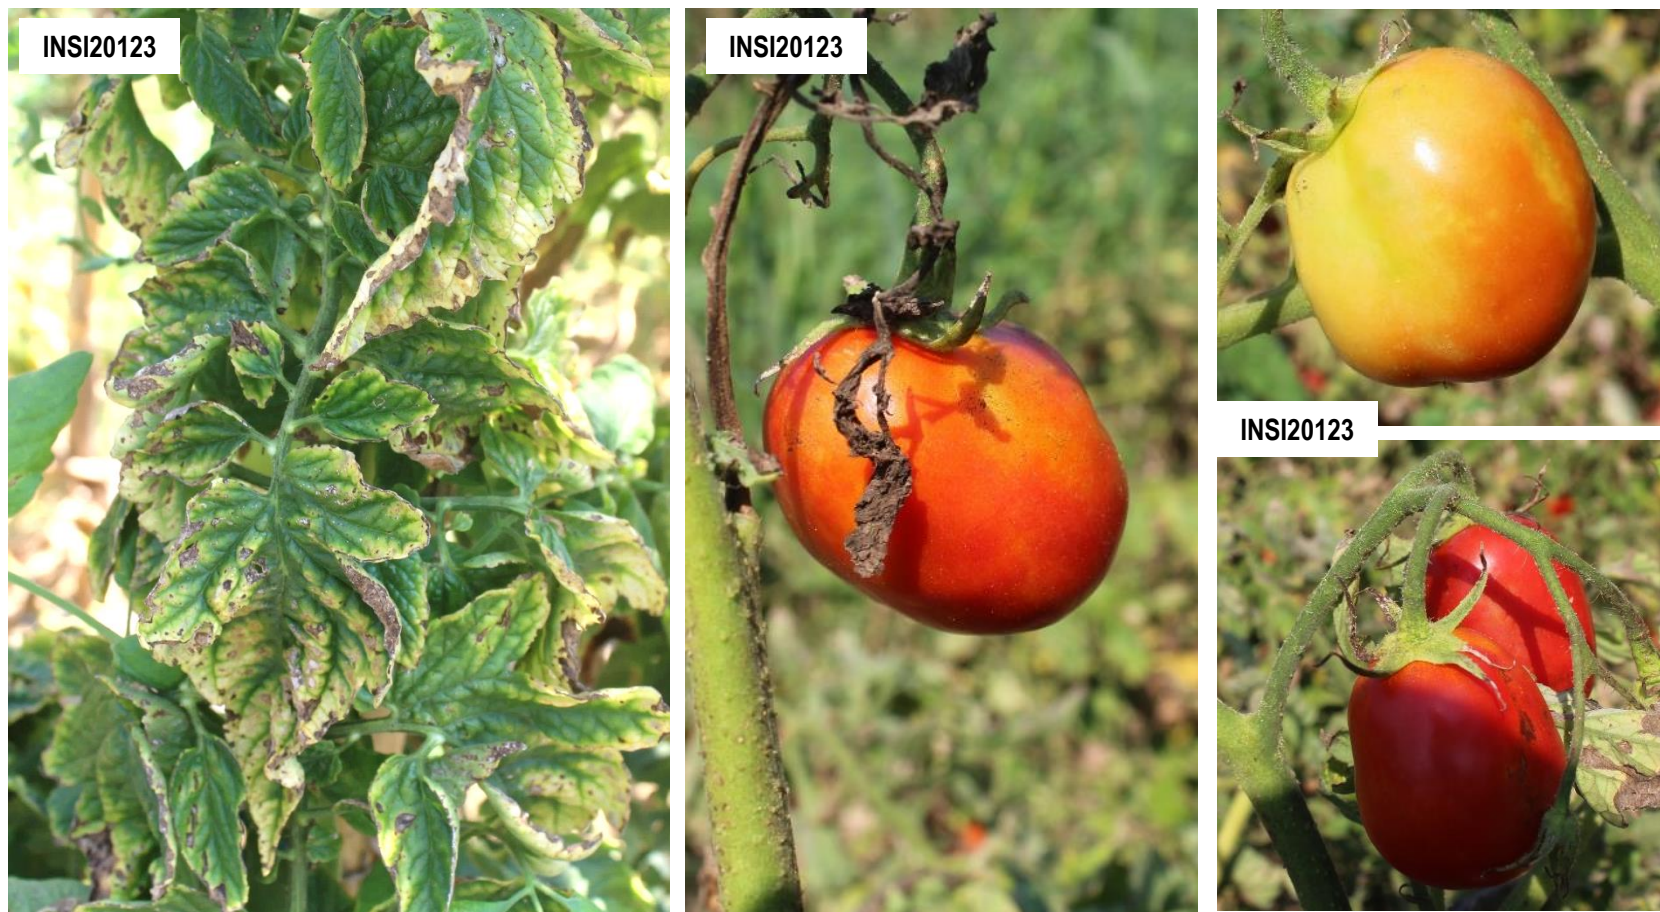

**Supplementary Figure 3-18.** Tomato betanucleorhabdovirus 2. The confirmed associated plant host shown is tomato (*Solanum lycopersicum*).

**Supplementary Figure 3** (continued). Representative field photos of confirmed associated plant hosts of selected viruses and putative viroids. **Note:** There are other viruses detected in the sequencing pools (*i.e.* composite sample) where the samples shown belong, which implies possible co-infection of viruses on the specific sample shown. Thus, it is difficult to associate the symptom phenotype with the detection of a single specific virus. Complete information on the individual samples can be found in Supplementary Table 1 and the description of symptoms of the associated plant hosts are summarized in Supplementary Table 9.



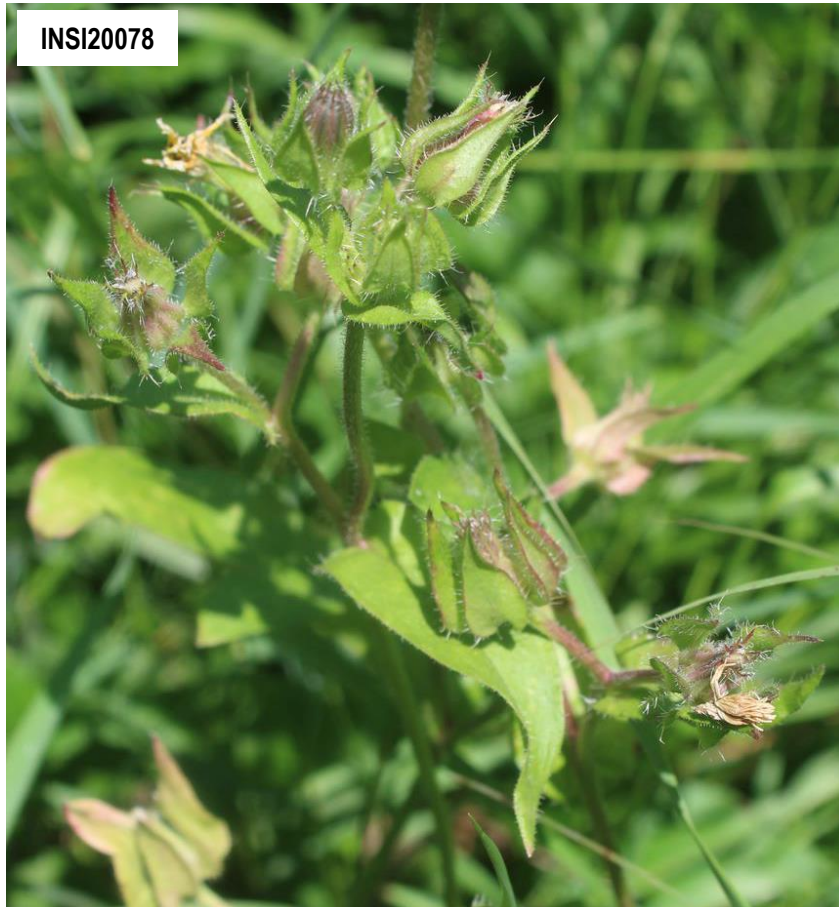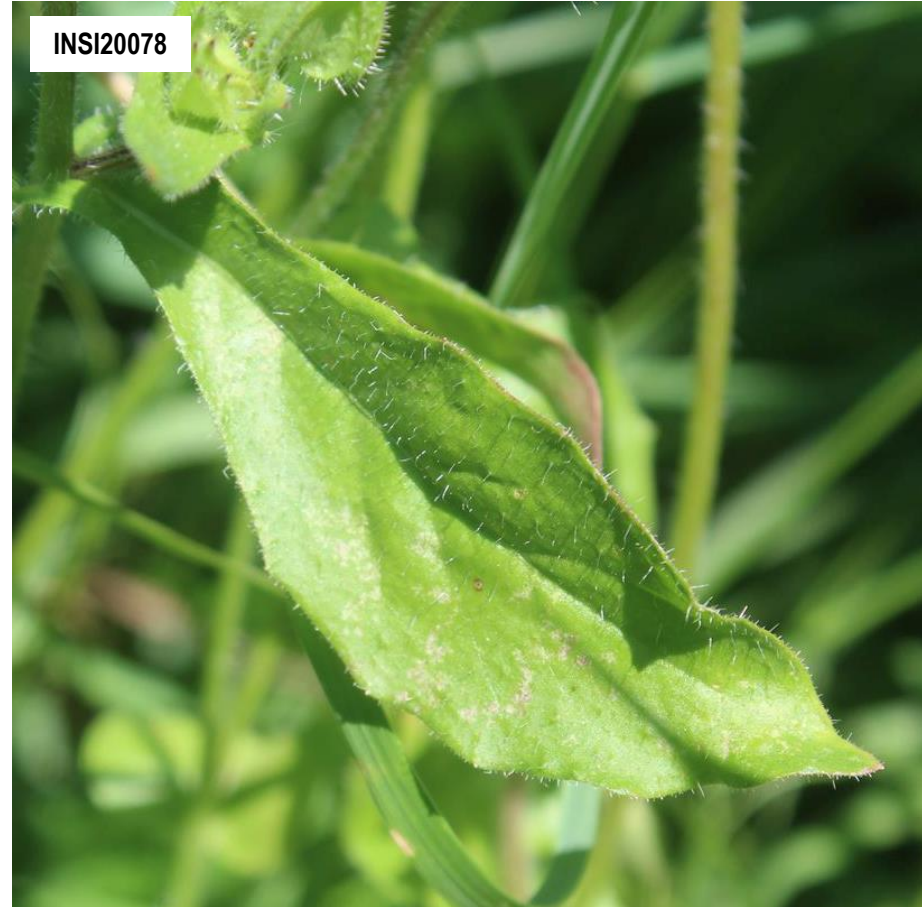

**Supplementary Figure 3-19.** *Picris betanucleorhabdovirus 1*. The confirmed associated plant host shown is *Picris echoides* (Asteraceae). The sample shown is also confirmed associated host of *Cichorium alphacarmovirus 1* and *Prunus virus I*.

**Supplementary Figure 3** (continued). Representative field photos of confirmed associated plant hosts of selected viruses and putative viroids. **Note:** There are other viruses detected in the sequencing pools (*i.e.* composite sample) where the samples shown belong, which implies possible co-infection of viruses on the specific sample shown. Thus, it is difficult to associate the symptom phenotype with the detection of a single specific virus. Complete information on the individual samples can be found in Supplementary Table 1 and the description of symptoms of the associated plant hosts are summarized in Supplementary Table 9.



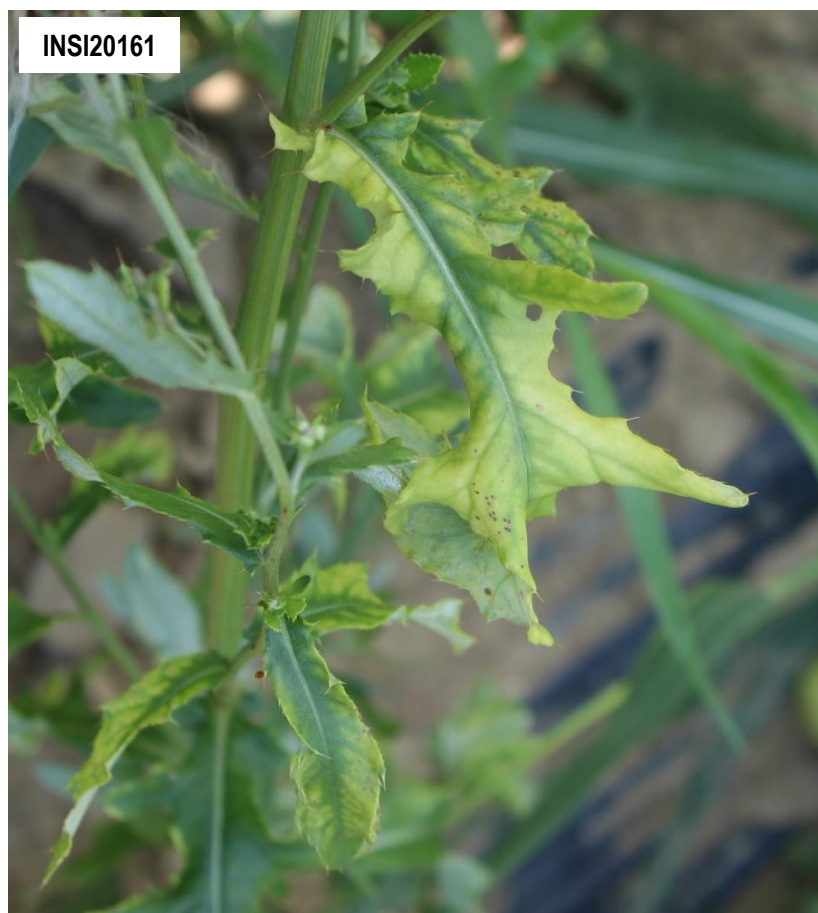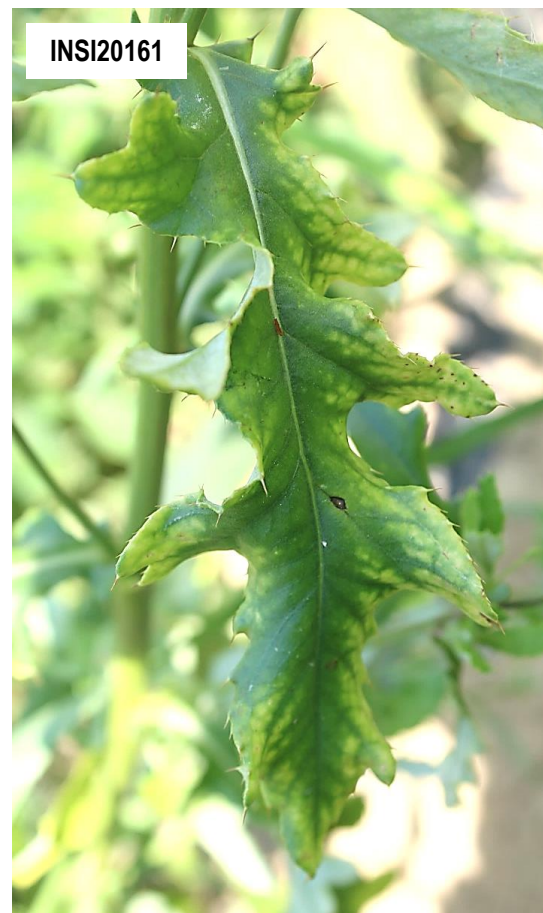

**Supplementary Figure 3-20.** *Cirsium cytorhabdovirus 1*. The confirmed associated plant host shown is *Cirsium arvense* (Asteraceae).

**Supplementary Figure 3** (continued). Representative field photos of confirmed associated plant hosts of selected viruses and putative viroids. **Note:** There are other viruses detected in the sequencing pools (*i.e.* composite sample) where the samples shown belong, which implies possible co-infection of viruses on the specific sample shown. Thus, it is difficult to associate the symptom phenotype with the detection of a single specific virus. Complete information on the individual samples can be found in Supplementary Table 1 and the description of symptoms of the associated plant hosts are summarized in Supplementary Table 9.

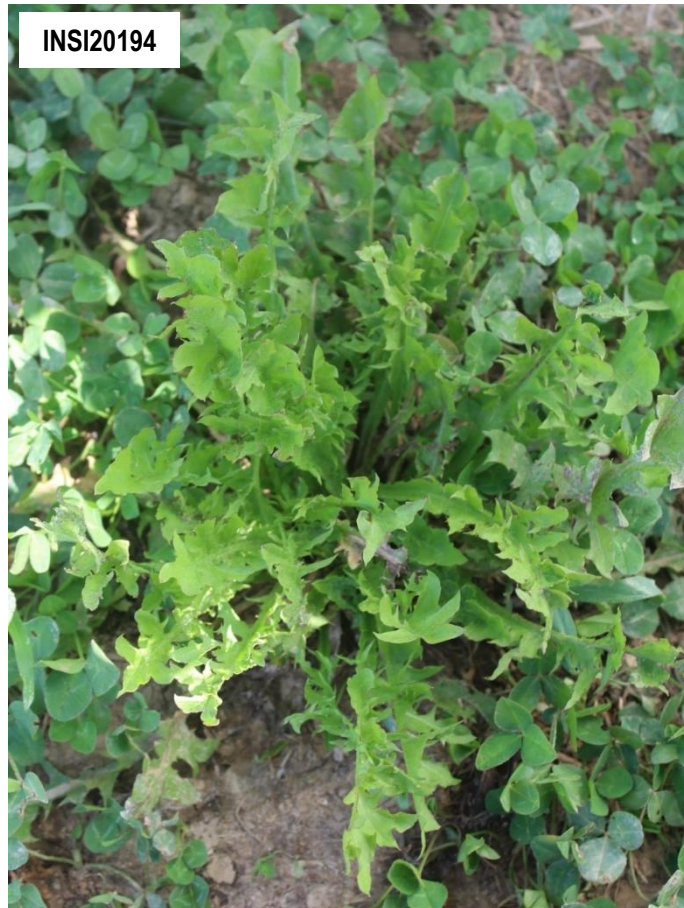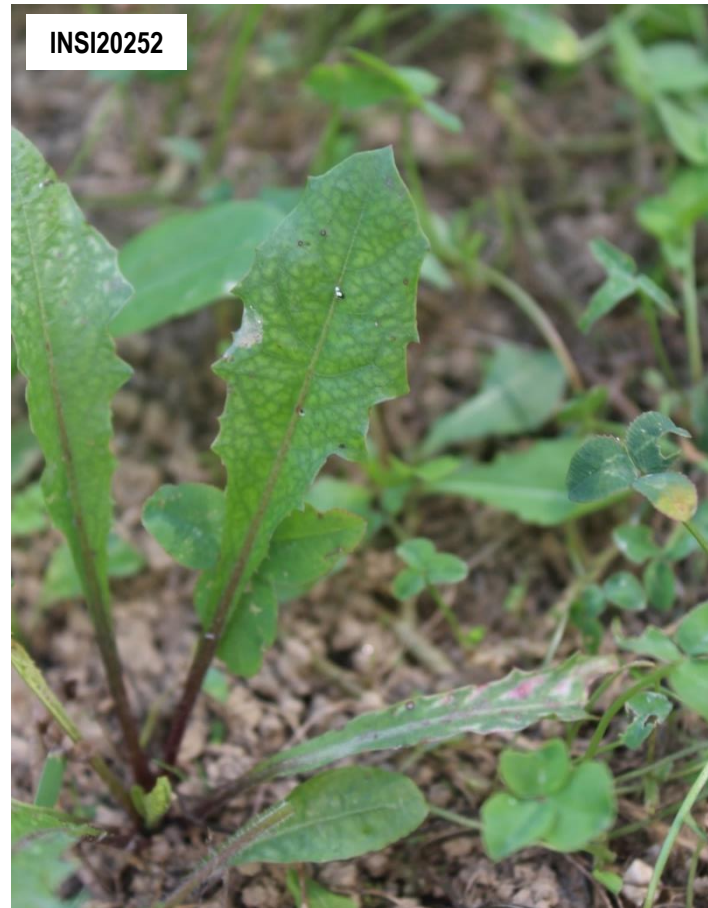

**Supplementary Figure 3-21.** *Taraxacum betanucleorhabdovirus 1*. The confirmed associated plant host shown is *Taraxacum officinale* (Asteraceae). Sample INSI20194 is also confirmed associated host of *Taraxacum cytorhabdovirus 1*, while sample INSI20252 is also confirmed associated host of *Taraxacum viroid-like circular RNA 1*.

**Supplementary Figure 3** (continued). Representative field photos of confirmed associated plant hosts of selected viruses and putative viroids. **Note:** There are other viruses detected in the sequencing pools (*i.e.* composite sample) where the samples shown belong, which implies possible co-infection of viruses on the specific sample shown. Thus, it is difficult to associate the symptom phenotype with the detection of a single specific virus. Complete information on the individual samples can be found in Supplementary Table 1 and the description of symptoms of the associated plant hosts are summarized in Supplementary Table 9.



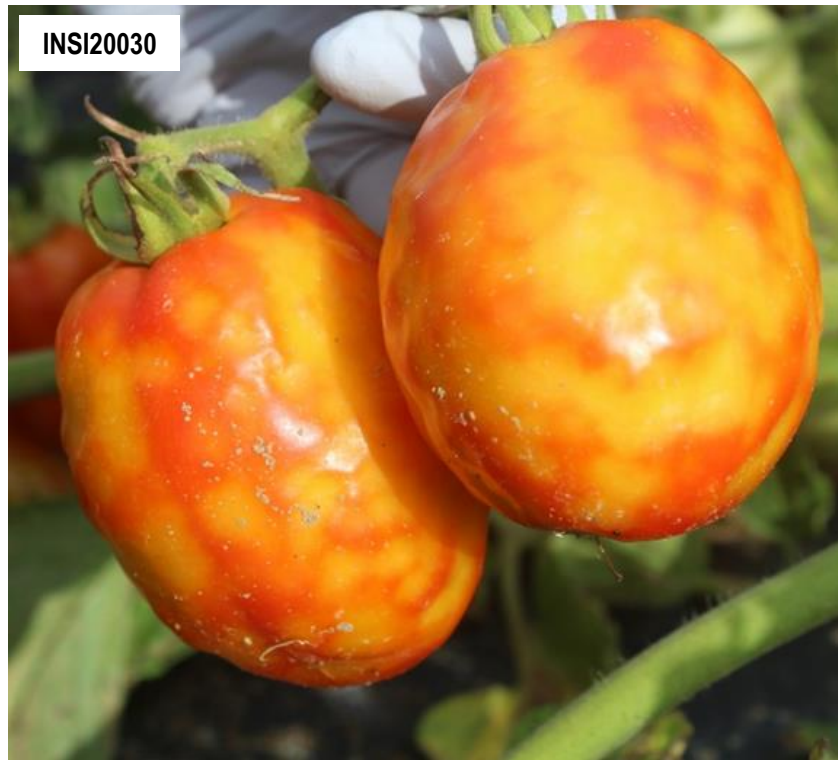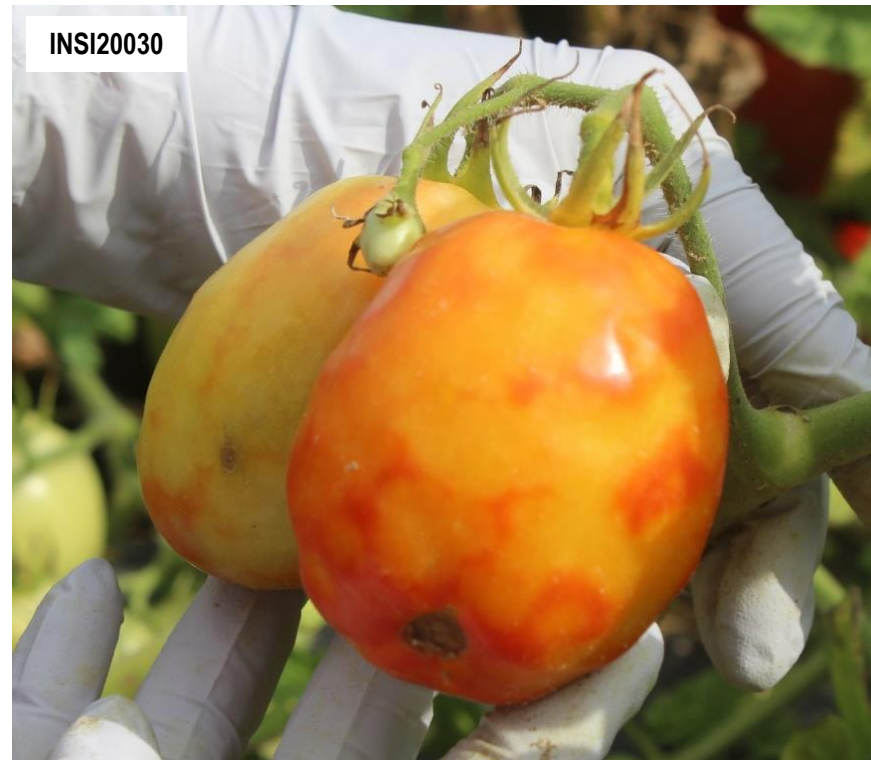

**Supplementary Figure 3-22.** Tomato alphanucleorhabdovirus 1. The confirmed associated plant host shown is tomato (*Solanum lycopersicum*).

**Supplementary Figure 3** (continued). Representative field photos of confirmed associated plant hosts of selected viruses and putative viroids. **Note:** There are other viruses detected in the sequencing pools (*i.e.* composite sample) where the samples shown belong, which implies possible co-infection of viruses on the specific sample shown. Thus, it is difficult to associate the symptom phenotype with the detection of a single specific virus. Complete information on the individual samples can be found in Supplementary Table 1 and the description of symptoms of the associated plant hosts are summarized in Supplementary Table 9.

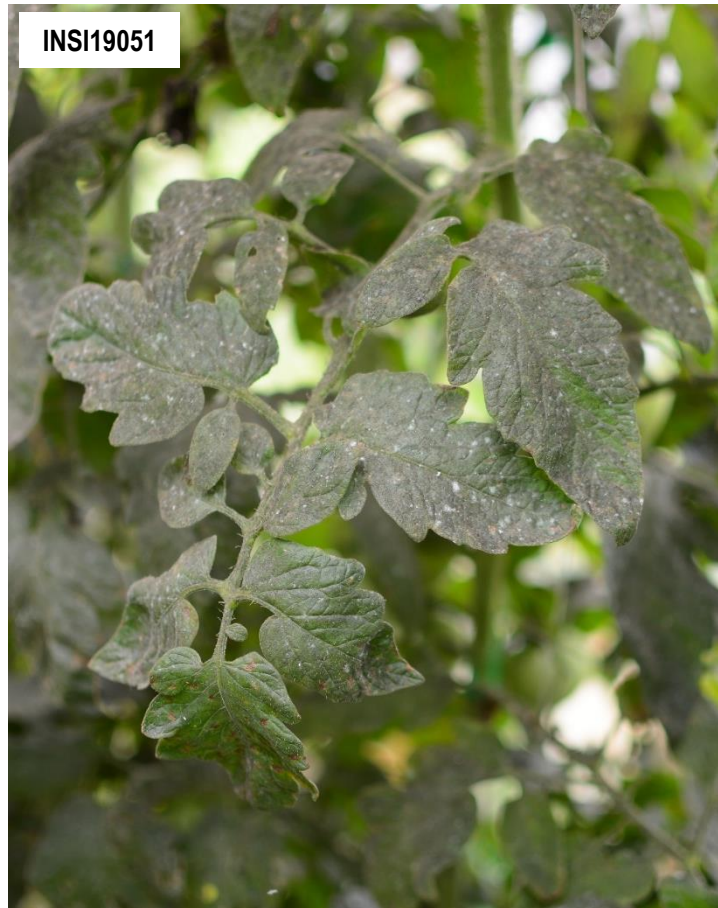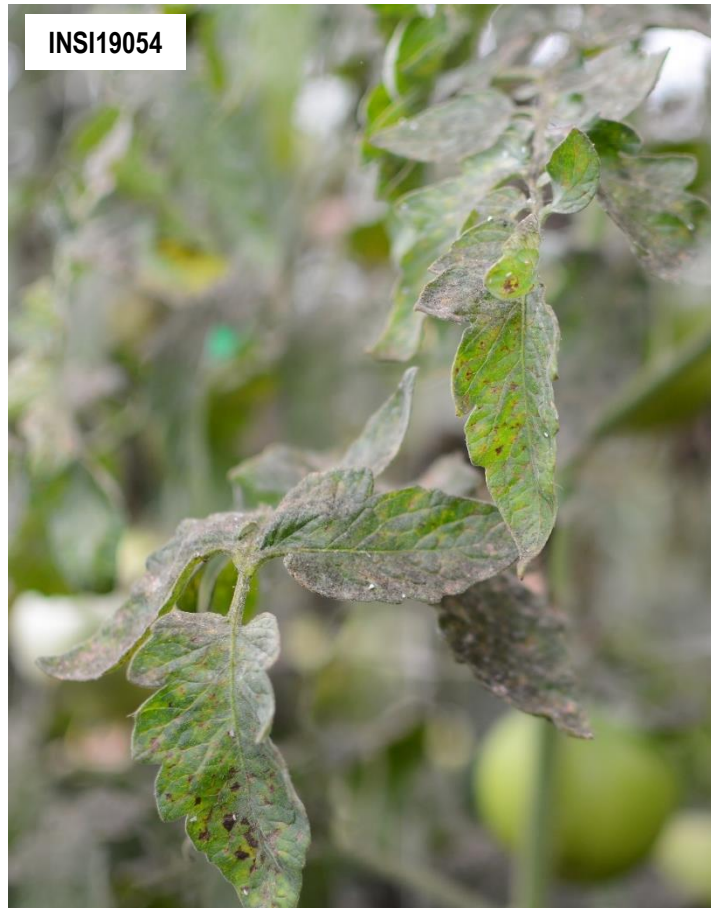

**Supplementary Figure 3-23.** *Leveillula taurica* associated rhabdo-like virus 1. The confirmed associated plant host shown is *Solanum lycopersicum* (Solanaceae).

**Supplementary Figure 3** (continued). Representative field photos of confirmed associated plant hosts of selected viruses and putative viroids. **Note:** There are other viruses detected in the sequencing pools (*i.e.* composite sample) where the samples shown belong, which implies possible co-infection of viruses on the specific sample shown. Thus, it is difficult to associate the symptom phenotype with the detection of a single specific virus. Complete information on the individual samples can be found in Supplementary Table 1 and the description of symptoms of the associated plant hosts are summarized in Supplementary Table 9.



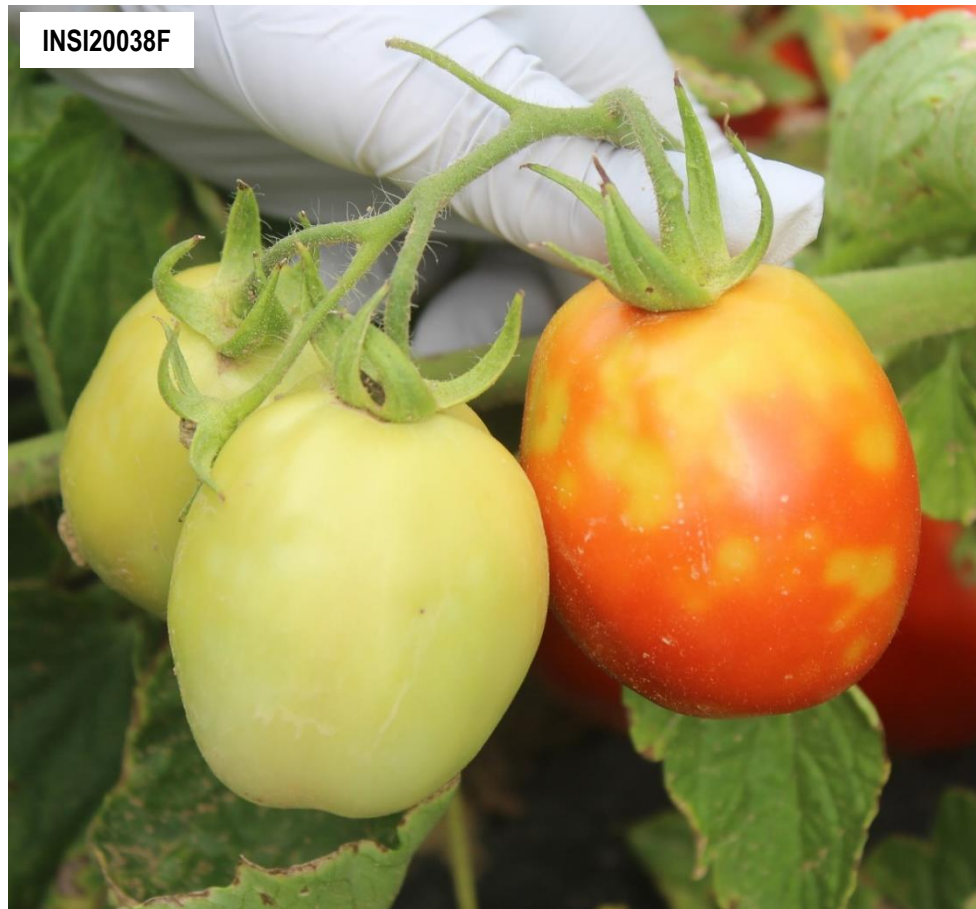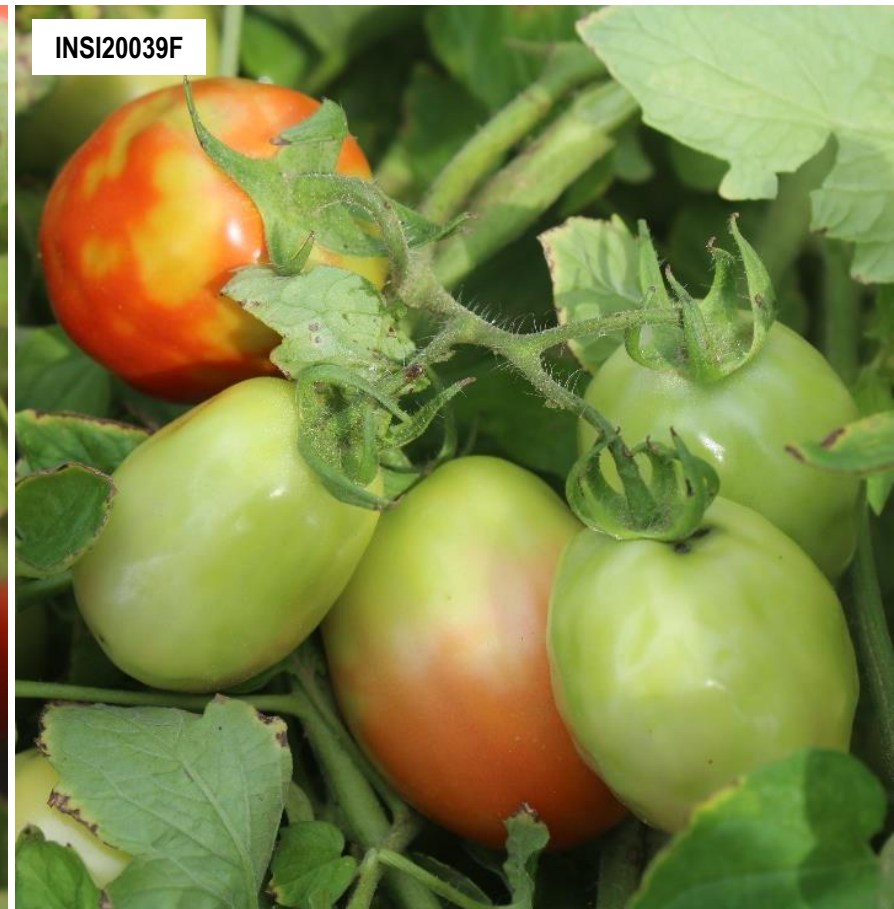

**Supplementary Figure 3-24.** Eggplant mottled dwarf alphanucleorhabdovirus. The confirmed associated plant host shown is *Solanum lycopersicum* (Solanaceae).

**Supplementary Figure 3** (continued). Representative field photos of confirmed associated plant hosts of selected viruses and putative viroids. **Note:** There are other viruses detected in the sequencing pools (*i.e.* composite sample) where the samples shown belong, which implies possible co-infection of viruses on the specific sample shown. Thus, it is difficult to associate the symptom phenotype with the detection of a single specific virus. Complete information on the individual samples can be found in Supplementary Table 1 and the description of symptoms of the associated plant hosts are summarized in Supplementary Table 9.



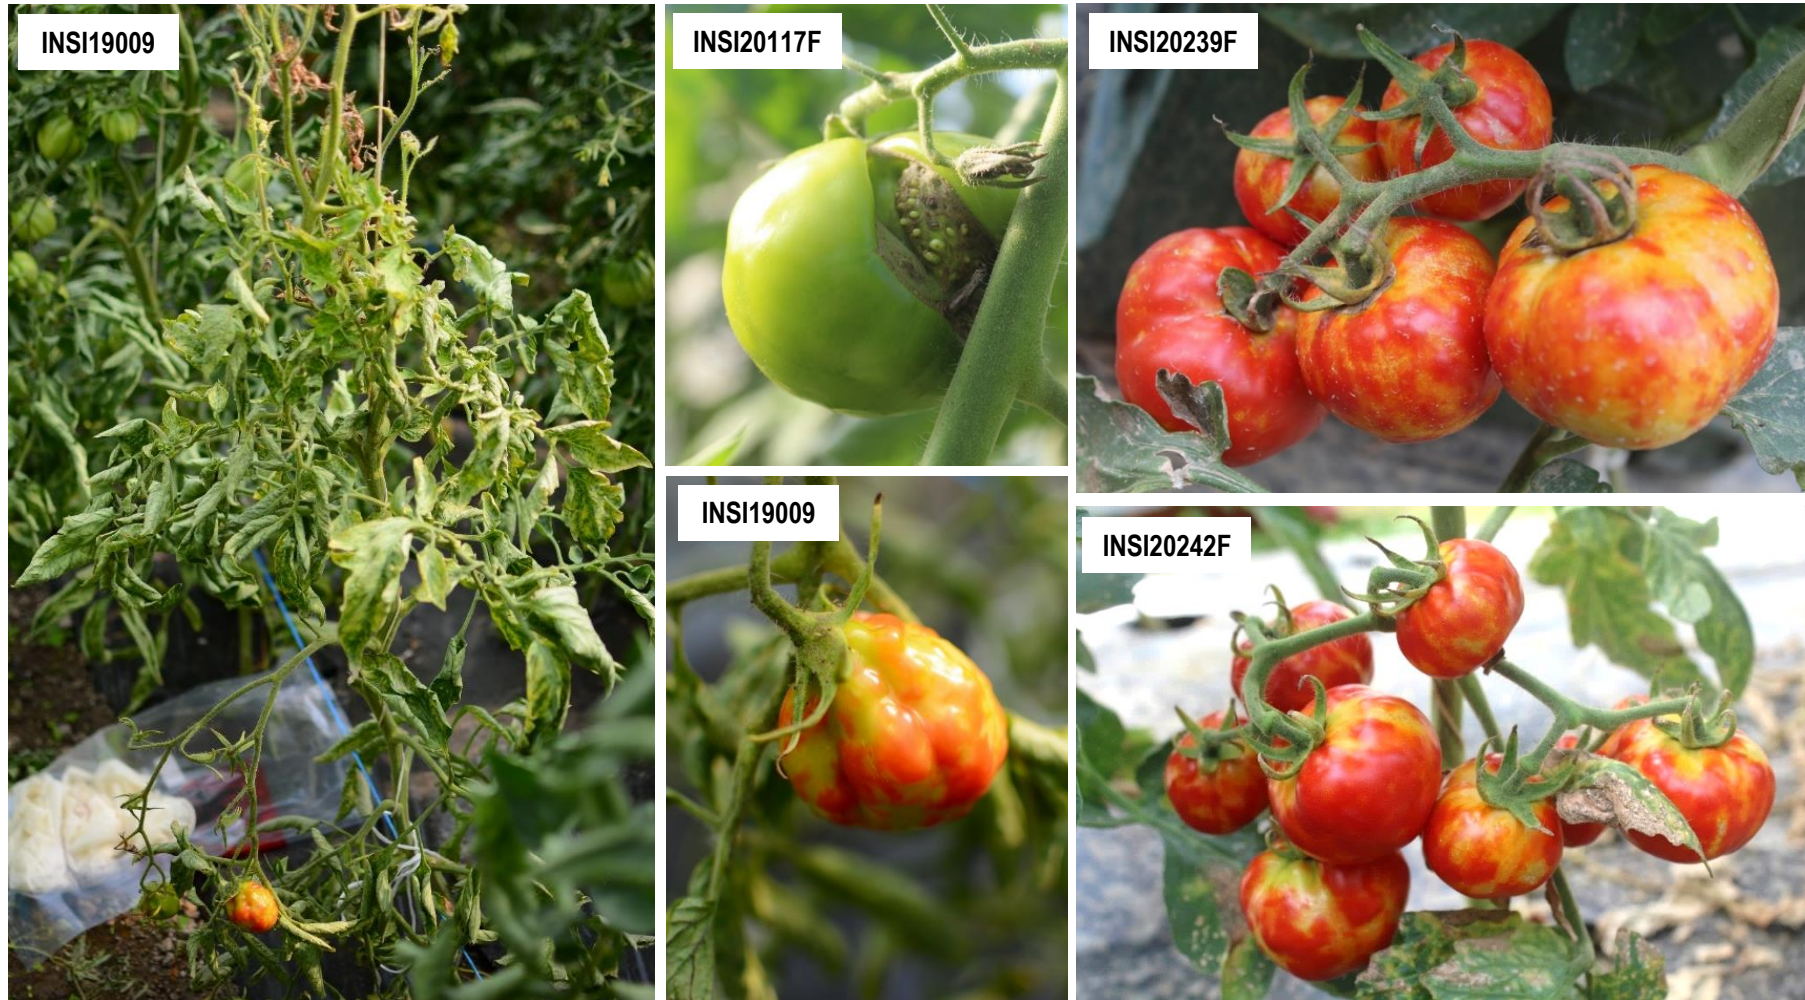

**Supplementary Figure 3-25.** *Physostegia chlorotic mottle alphanucleorhabdovirus*. All confirmed associated plant hosts shown are tomatoes (*Solanum lycopersicum*).

**Supplementary Figure 3** (continued). Representative field photos of confirmed associated plant hosts of selected viruses and putative viroids. **Note:** There are other viruses detected in the sequencing pools (*i.e.* composite sample) where the samples shown belong, which implies possible co-infection of viruses on the specific sample shown. Thus, it is difficult to associate the symptom phenotype with the detection of a single specific virus. Complete information on the individual samples can be found in Supplementary Table 1 and the description of symptoms of the associated plant hosts are summarized in Supplementary Table 9.



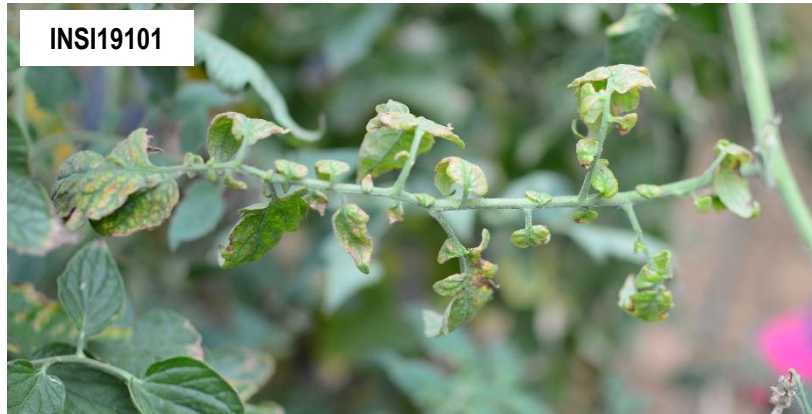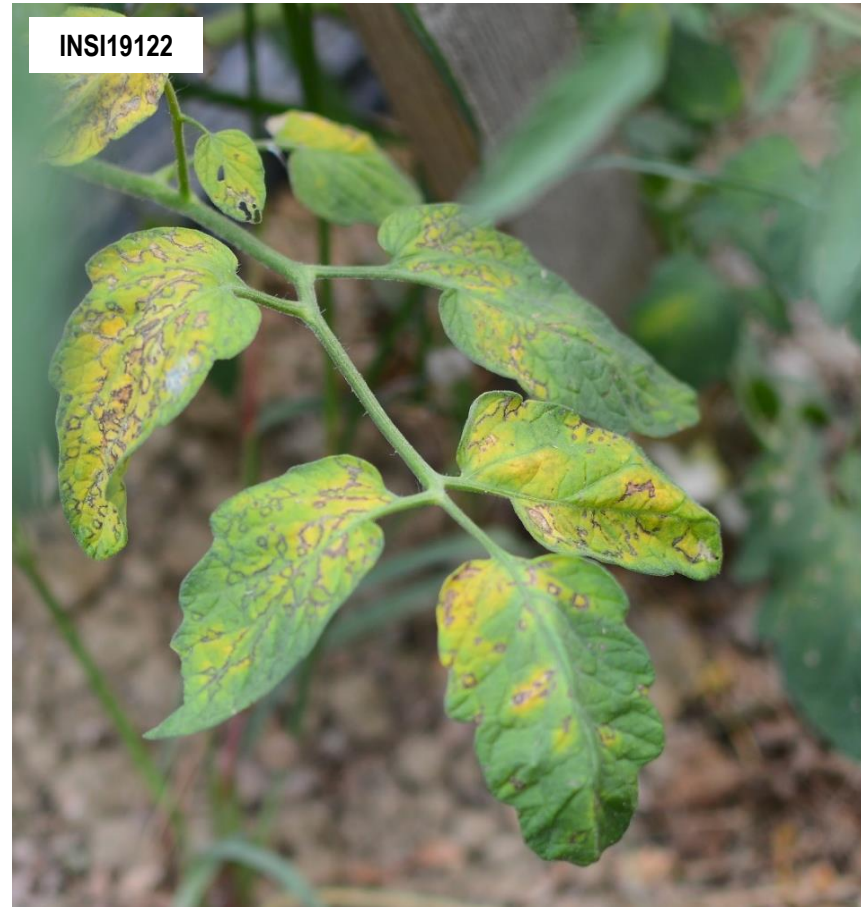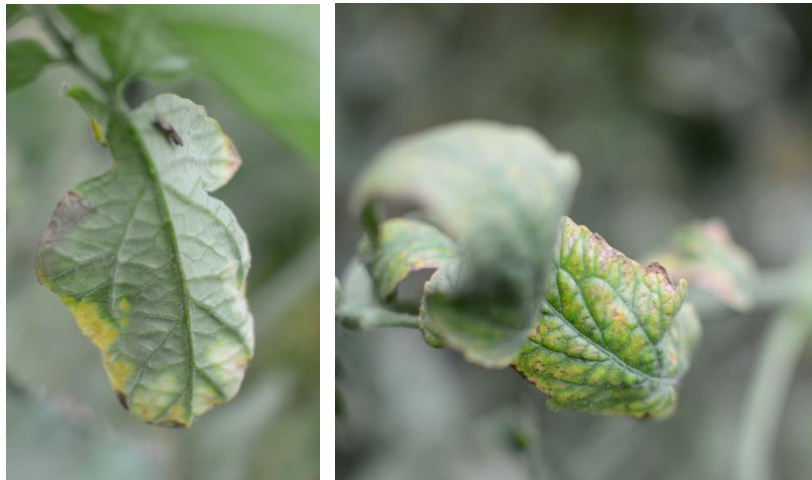

**Supplementary Figure 3-26.** Tomato fruit blotch virus and Tomato matilda virus co-infected samples. The confirmed associated plant host shown is *Solanum lycopersicum* (Solanaceae).

**Supplementary Figure 3** (continued). Representative field photos of confirmed associated plant hosts of selected viruses and putative viroids. **Note:** There are other viruses detected in the sequencing pools (*i.e.* composite sample) where the samples shown belong, which implies possible co-infection of viruses on the specific sample shown. Thus, it is difficult to associate the symptom phenotype with the detection of a single specific virus. Complete information on the individual samples can be found in Supplementary Table 1 and the description of symptoms of the associated plant hosts are summarized in Supplementary Table 9.

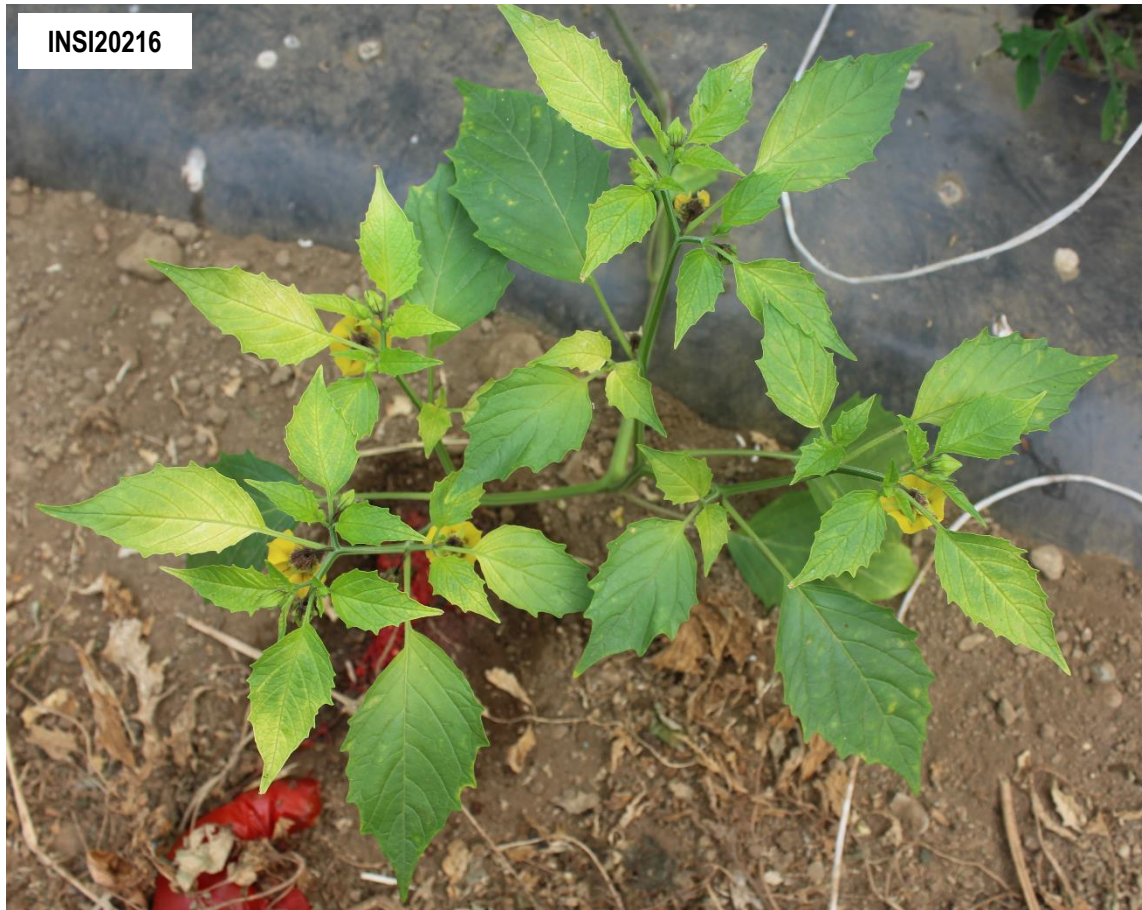

**Supplementary Figure 3-27.** Solanum nigrum ilarvirus 1. The confirmed associated plant host shown is *Physalis* sp. (Solanaceae).

**Supplementary Figure 3** (continued). Representative field photos of confirmed associated plant hosts of selected viruses and putative viroids. **Note:** There are other viruses detected in the sequencing pools (*i.e.* composite sample) where the samples shown belong, which implies possible co-infection of viruses on the specific sample shown. Thus, it is difficult to associate the symptom phenotype with the detection of a single specific virus. Complete information on the individual samples can be found in Supplementary Table 1 and the description of symptoms of the associated plant hosts are summarized in Supplementary Table 9.
