# Supplementary material
Source: PubMed Central journal article supplement (PMC10044381)
Supplement: 40168_2023_1500_MOESM10_ESM.pdf [file 40168_2023_1500_MOESM10_ESM.pdf]

# In-depth study of tomato and weed viromes reveals undiscovered plant virus diversity in an agroecosystem

Rivarez, MPS<sup>1,2,\*</sup>, Pecman, A<sup>1,2</sup>, Bačnik, K<sup>1,2</sup>, Maksimović Carvalho Ferreira, O<sup>1,2</sup>, Vučurović, A<sup>1</sup>, Seljak, G<sup>1</sup>, Mehle, N<sup>1,3</sup>, Gutiérrez-Aguirre, I<sup>1</sup>, Ravnikar, M<sup>1</sup>, and Kutnjak, D<sup>1,\*</sup>

<sup>1</sup>Department of Biotechnology and Systems Biology, National Institute of Biology, Večna pot 111, Ljubljana, 1000 Slovenia. <sup>2</sup>Jožef Stefan International Postgraduate School, Jamova cesta 39, Ljubljana, 1000 Slovenia. <sup>3</sup>School for Viticulture and Enology, University of Nova Gorica, Dvorec Lanthieri Glavni trg 8, Vipava, 5271 Slovenia. \*for correspondence email Denis Kutnjak ([denis.kutnjak@nib.si](mailto:denis.kutnjak@nib.si)) and Mark Paul Selda Rivarez ([mpsrivarez@gmail.com](mailto:mpsrivarez@gmail.com))

## SUPPLEMENTARY INFORMATION

### Additional File 10

**Supplementary Figure 5.** RT-PCR, TEM and nanopore sequencing results on the confirmation of infectivity of *Plantago tobamovirus 1* (PTV1) on Solanaceae hosts.

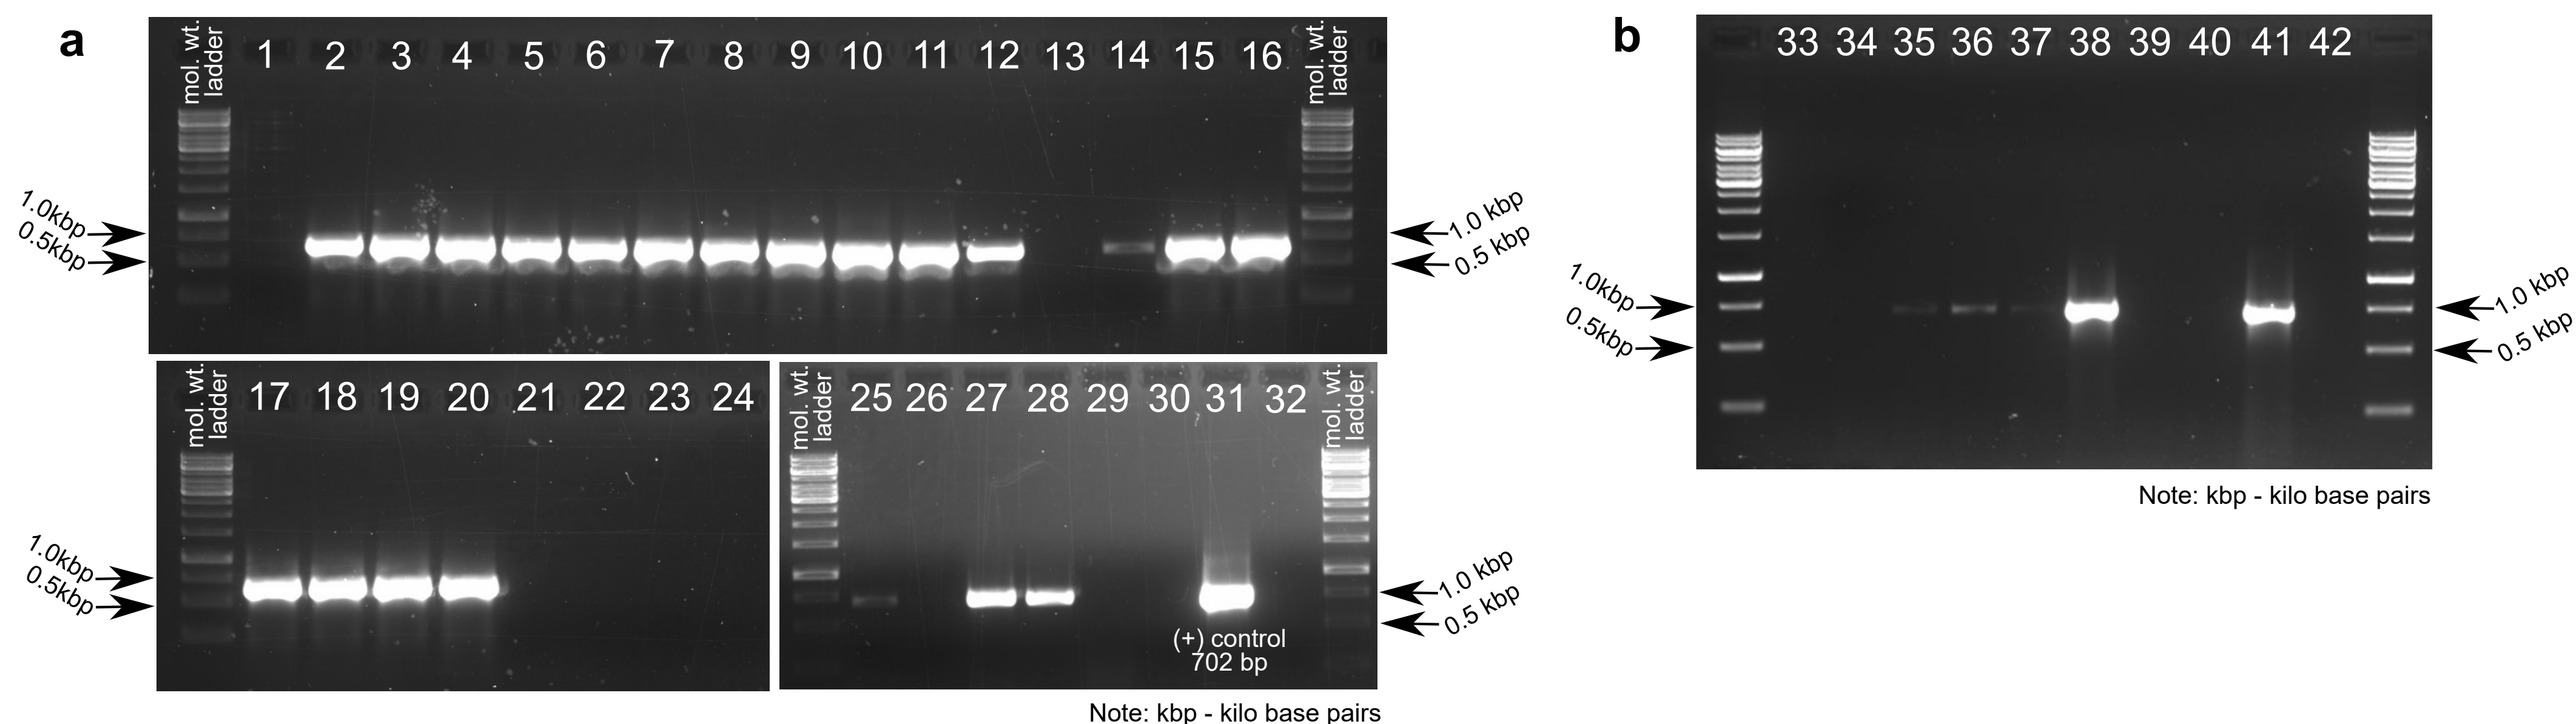

Samples tested in the RT-PCR assay shown in **a**:

Assay controls in **a**:

- 1 - non-template control 1
- 13 - blank 1
- 21 - negative control of RNA isolation 1
- 22 - negative control of RNA isolation 2
- 23 - non-template control 1
- 24 - blank 2
- 31 - positive control (PTV1 RNA)
- 32 - negative control of RNA isolation 3

| Inoculated plant             | 7dpi pool of inoculated leaves | 14 dpi pool of inoculated leaves | 14 dpi pool of young apical (systemic) leaves | 21 dpi pool of young apical (systemic) leaves | 28 dpi pool of young apical (systemic) leaves | 35 dpi pool of young apical (systemic) leaves |
|------------------------------|--------------------------------|----------------------------------|-----------------------------------------------|-----------------------------------------------|-----------------------------------------------|-----------------------------------------------|
| <i>Solanum lycopersicum</i>  | 2 <sup>asym</sup>              | 8 <sup>asym</sup>                | 14 <sup>asym</sup>                            | 25 <sup>a,asym</sup><br>26 <sup>b,asym</sup>  | 27 <sup>a,asym</sup><br>28 <sup>b,asym</sup>  | 29 <sup>a,asym</sup><br>30 <sup>b,asym</sup>  |
| <i>Nicotiana benthamiana</i> | 3 <sup>sym</sup>               | 9 <sup>sym</sup>                 | 15 <sup>sym</sup>                             | 17 <sup>sym</sup>                             | 19 <sup>sym</sup>                             | not tested                                    |
| <i>Nicotiana clevelandii</i> | 4 <sup>sym</sup>               | 10 <sup>sym</sup>                | 16 <sup>sym</sup>                             | 18 <sup>sym</sup>                             | 20 <sup>sym,HTS(+)</sup>                      | not tested                                    |

Note: dpi - days post inoculation, <sup>a</sup>10x diluted RNA, <sup>b</sup>100x diluted RNA, <sup>asym</sup>asymptomatic, <sup>sym</sup>symptomatic, <sup>HTS(+)</sup> was used in HTS where presence of PTV1 was confirmed. Other inoculated plants tested: 7dpi/14dpi pool of inoculated leaves: *Nicotiana tabacum* (lane 5/lane11), *Nicotiana glutinosa* (lane 6/lane12), *Chenopodium quinoa* (lane 7/-);

Samples tested in the RT-PCR assay shown in **b**:

Assay controls in **b**:

- 33 - non-template control
- 41 - positive control (PTV1 RNA)
- 42 - negative control of RNA isolation

| Inoculated plant            | 28 dpi young apical (systemic) leaves from individual plants |                    |                    |                    |                    | 49 dpi pool of young apical (systemic) leaves | 56 dpi pool of young apical (systemic) leaves |
|-----------------------------|--------------------------------------------------------------|--------------------|--------------------|--------------------|--------------------|-----------------------------------------------|-----------------------------------------------|
|                             | plant 1                                                      | plant 2            | plant 3            | plant 4            | plant 5            |                                               |                                               |
| <i>Solanum lycopersicum</i> | 34 <sup>asym</sup>                                           | 35 <sup>asym</sup> | 36 <sup>asym</sup> | 37 <sup>asym</sup> | 38 <sup>asym</sup> | 39 <sup>asym</sup>                            | 40 <sup>asym</sup>                            |

Note: RNA extracts used in this assay (**b**) were diluted 1:200, except for the positive control. dpi - days post inoculation. <sup>asym</sup>asymptomatic. <sup>sym</sup>symptomatic.

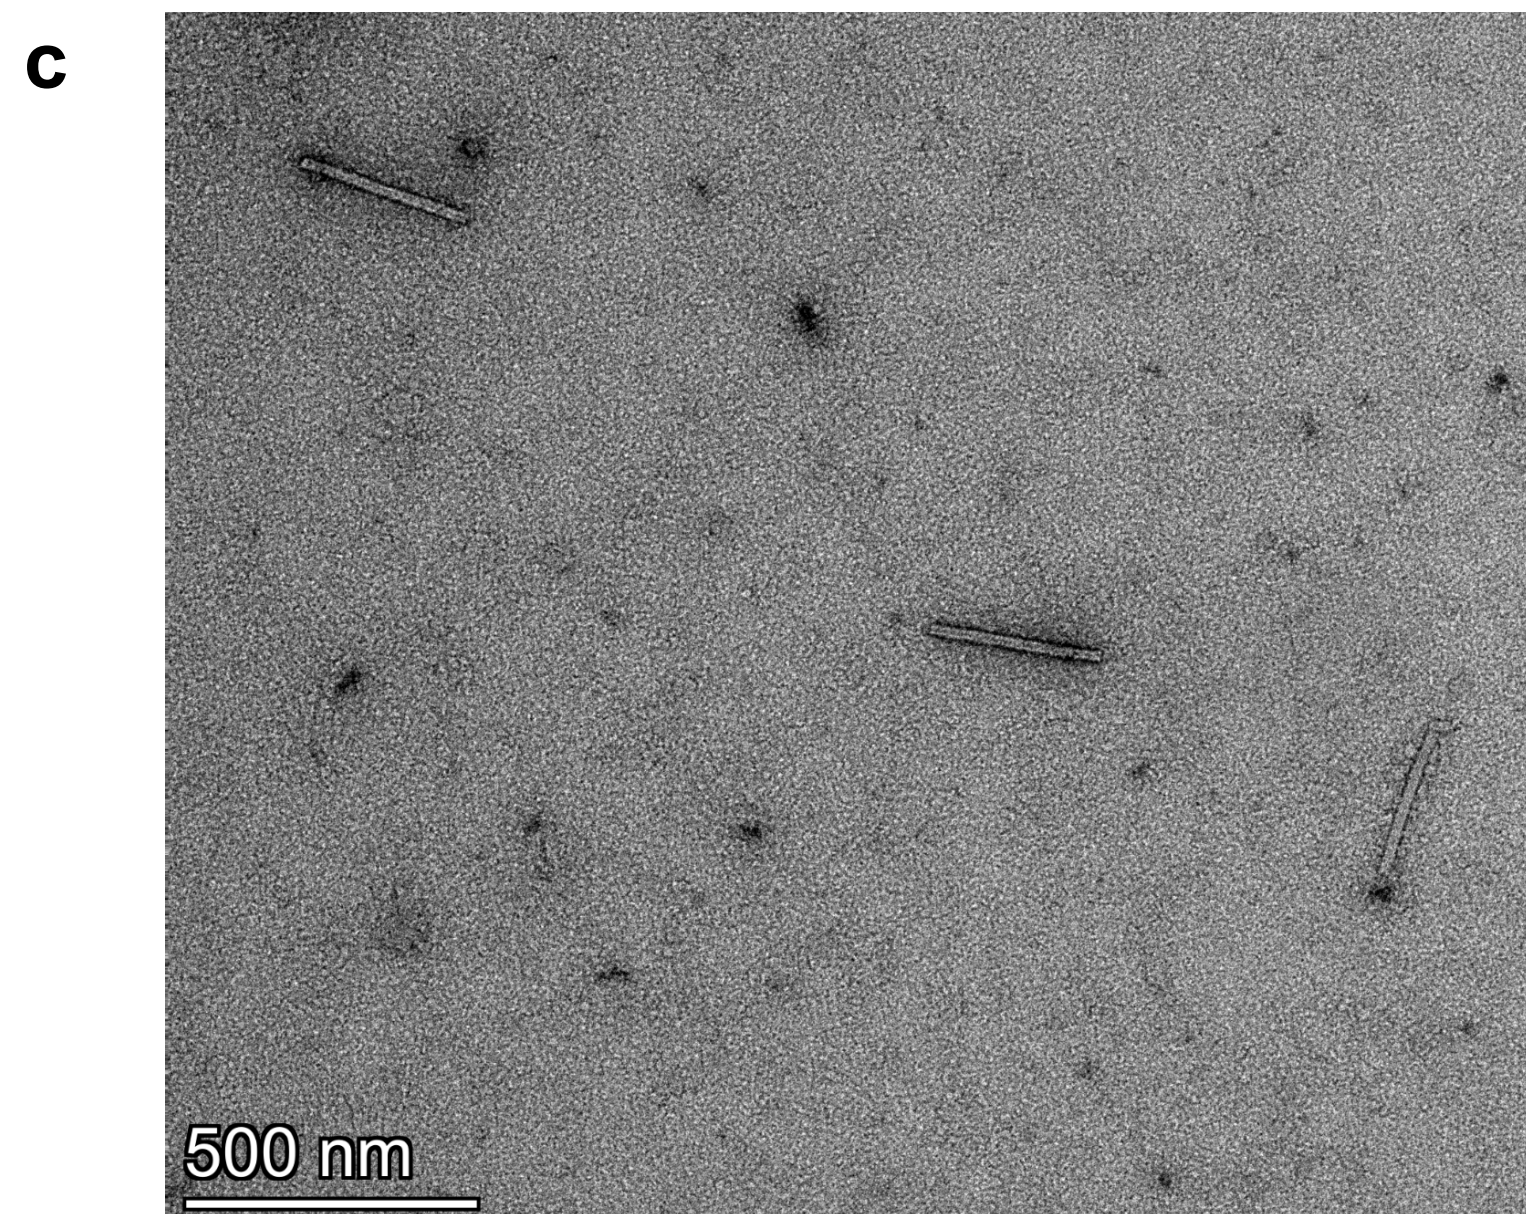

| Test plant / collection dpi / individual or pooled?                  | No. of quality-controlled (QC) reads | No. of reads mapping to PTV1 genome | Percentage of QC reads mapping to PTV1 genome |
|----------------------------------------------------------------------|--------------------------------------|-------------------------------------|-----------------------------------------------|
| <i>Solanum lycopersicum</i> / 28 dpi / individual plant <sup>a</sup> | 157191                               | 0                                   | 0.00%                                         |
| <i>Solanum lycopersicum</i> / 28 dpi / individual plant <sup>b</sup> | 160438                               | 0                                   | 0.00%                                         |
| <i>Nicotiana clevelandii</i> / 21 dpi / pooled plants <sup>c</sup>   | 159570                               | 14216                               | 8.91%                                         |

Note: <sup>a</sup>lane 35 in (**b**). <sup>b</sup>lane 37 in (**b**). <sup>c</sup>lane 18 in (**a**).

**Supplementary Figure 5. RT-PCR, TEM and nanopore sequencing results on the confirmation of infectivity of Plantago tobamovirus 1 (PTV1) on Solanaceae hosts. a, b** RT-PCR assays for the detection of PTV1 in inoculated and young apical (systemic) leaves at different time points. **c** Transmission electron micrograph showing three virions of PTV1 from crude preparations of infected *Nicotiana clevelandii* tissues. **d** Number and proportion of long reads mapping to PTV1 genome, derived from selected inoculated plants.
